# Supplementary material for: Managing Interdependence-Induced Systemic Risks in Infrastructure Projects
Source: Atypon-hosted journal article supplement (doi:10.1061/(asce)me.1943-5479.0001071), 2022-07-04
Supplement: supplemental materials_me.1943-5479.0001071_moussa.pdf [file supplemental%20materials_me.1943-5479.0001071_moussa.pdf]

## SUPPLEMENTAL MATERIALS

*ASCE Journal of Management in Engineering*

# Managing Interdependence-Induced Systemic Risks in Infrastructure Projects

Ahmed Moussa and Wael El-Dakhakhni

**DOI:** 10.1061/(ASCE)ME.1943-5479.0001071

© ASCE 2022

[www.ascelibrary.org](http://www.ascelibrary.org)

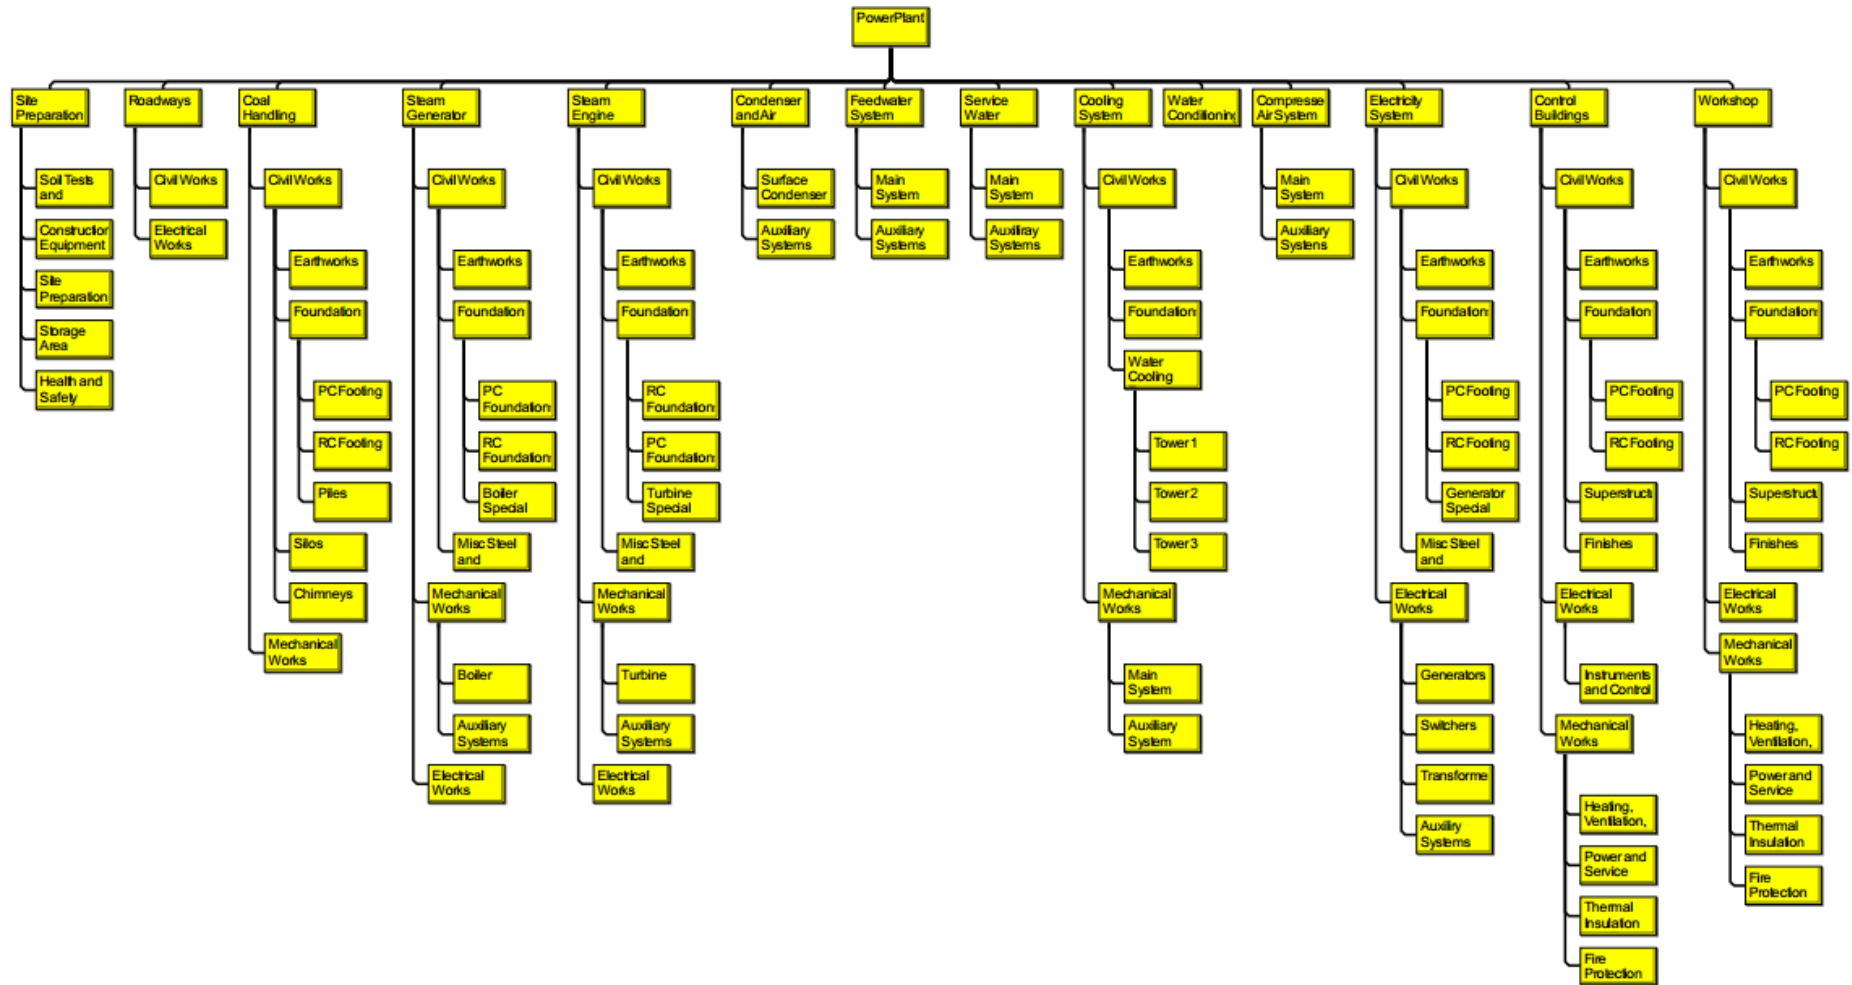

Fig. S1. Work break-down structure of the power plant project.

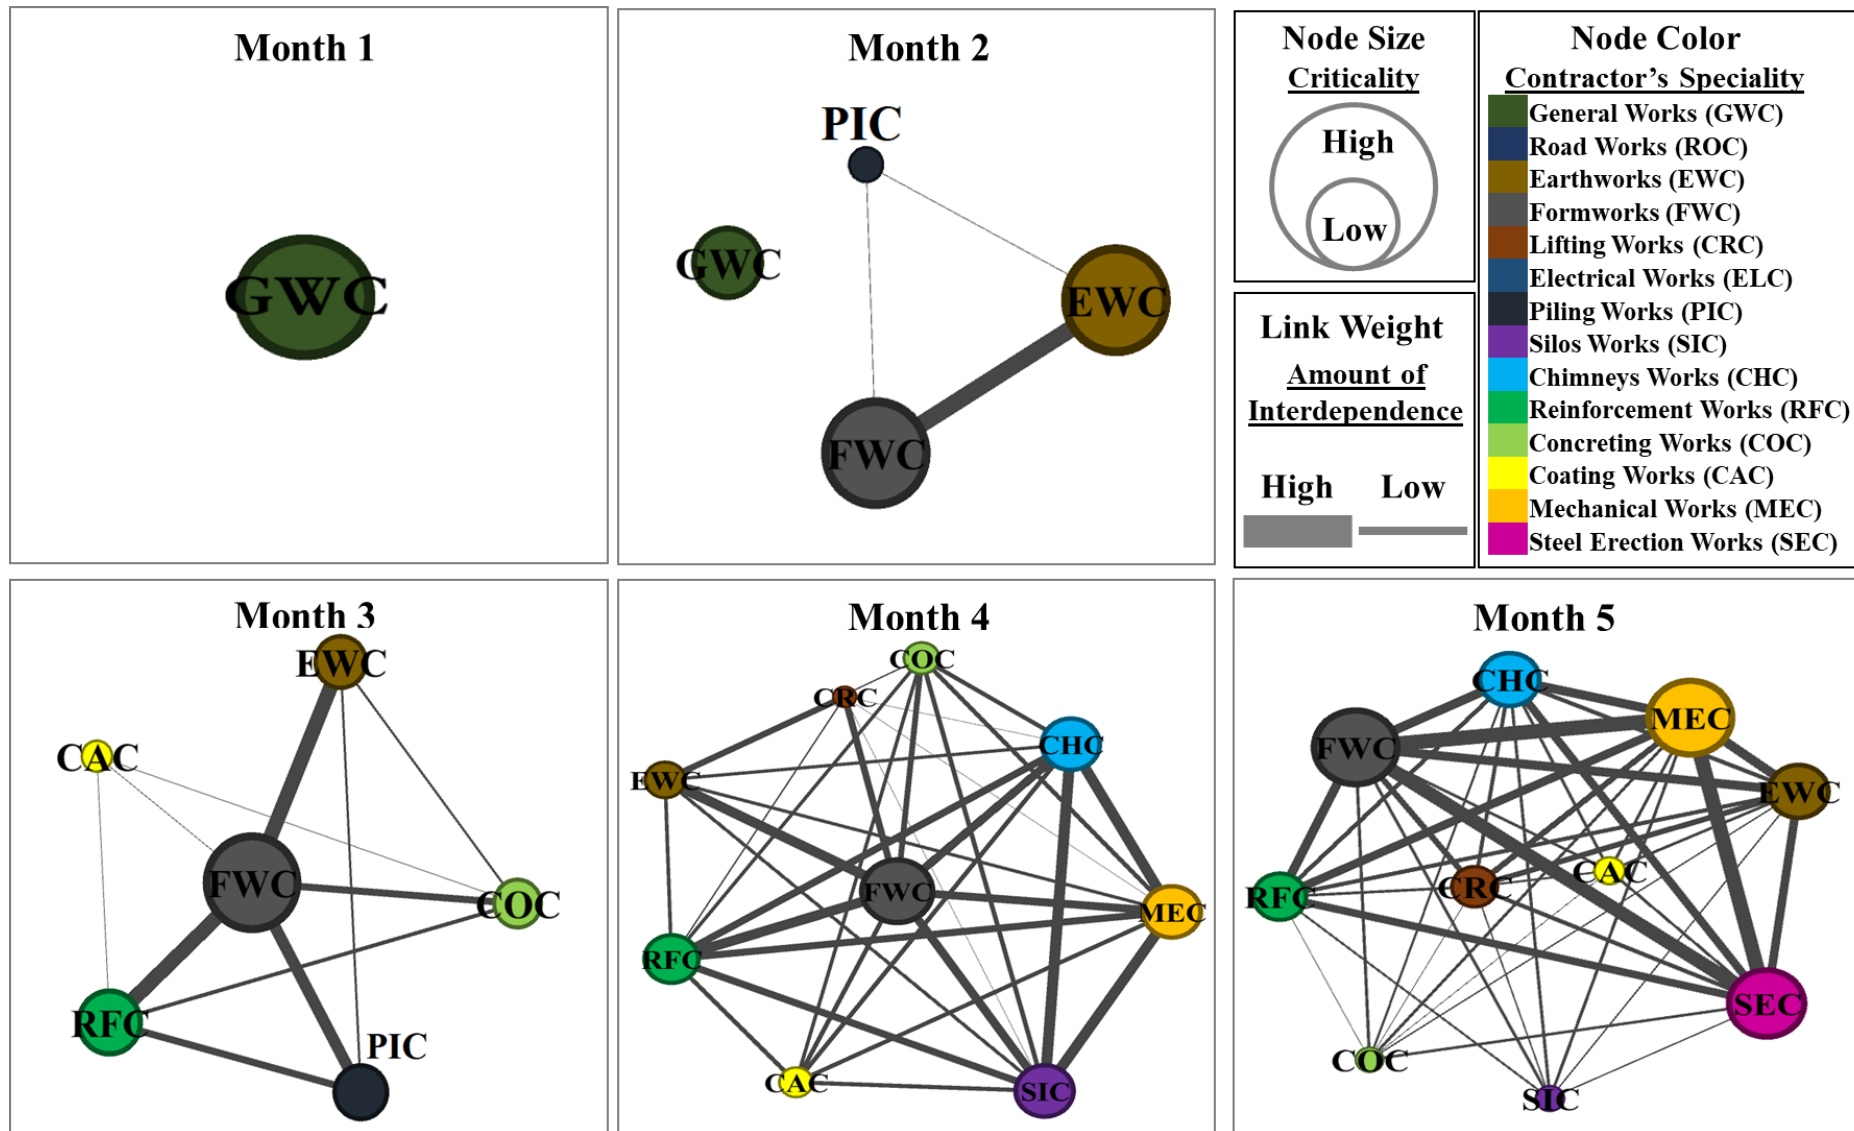

Fig. S2(a). Networks of months 1 to 5 of the project's duration.

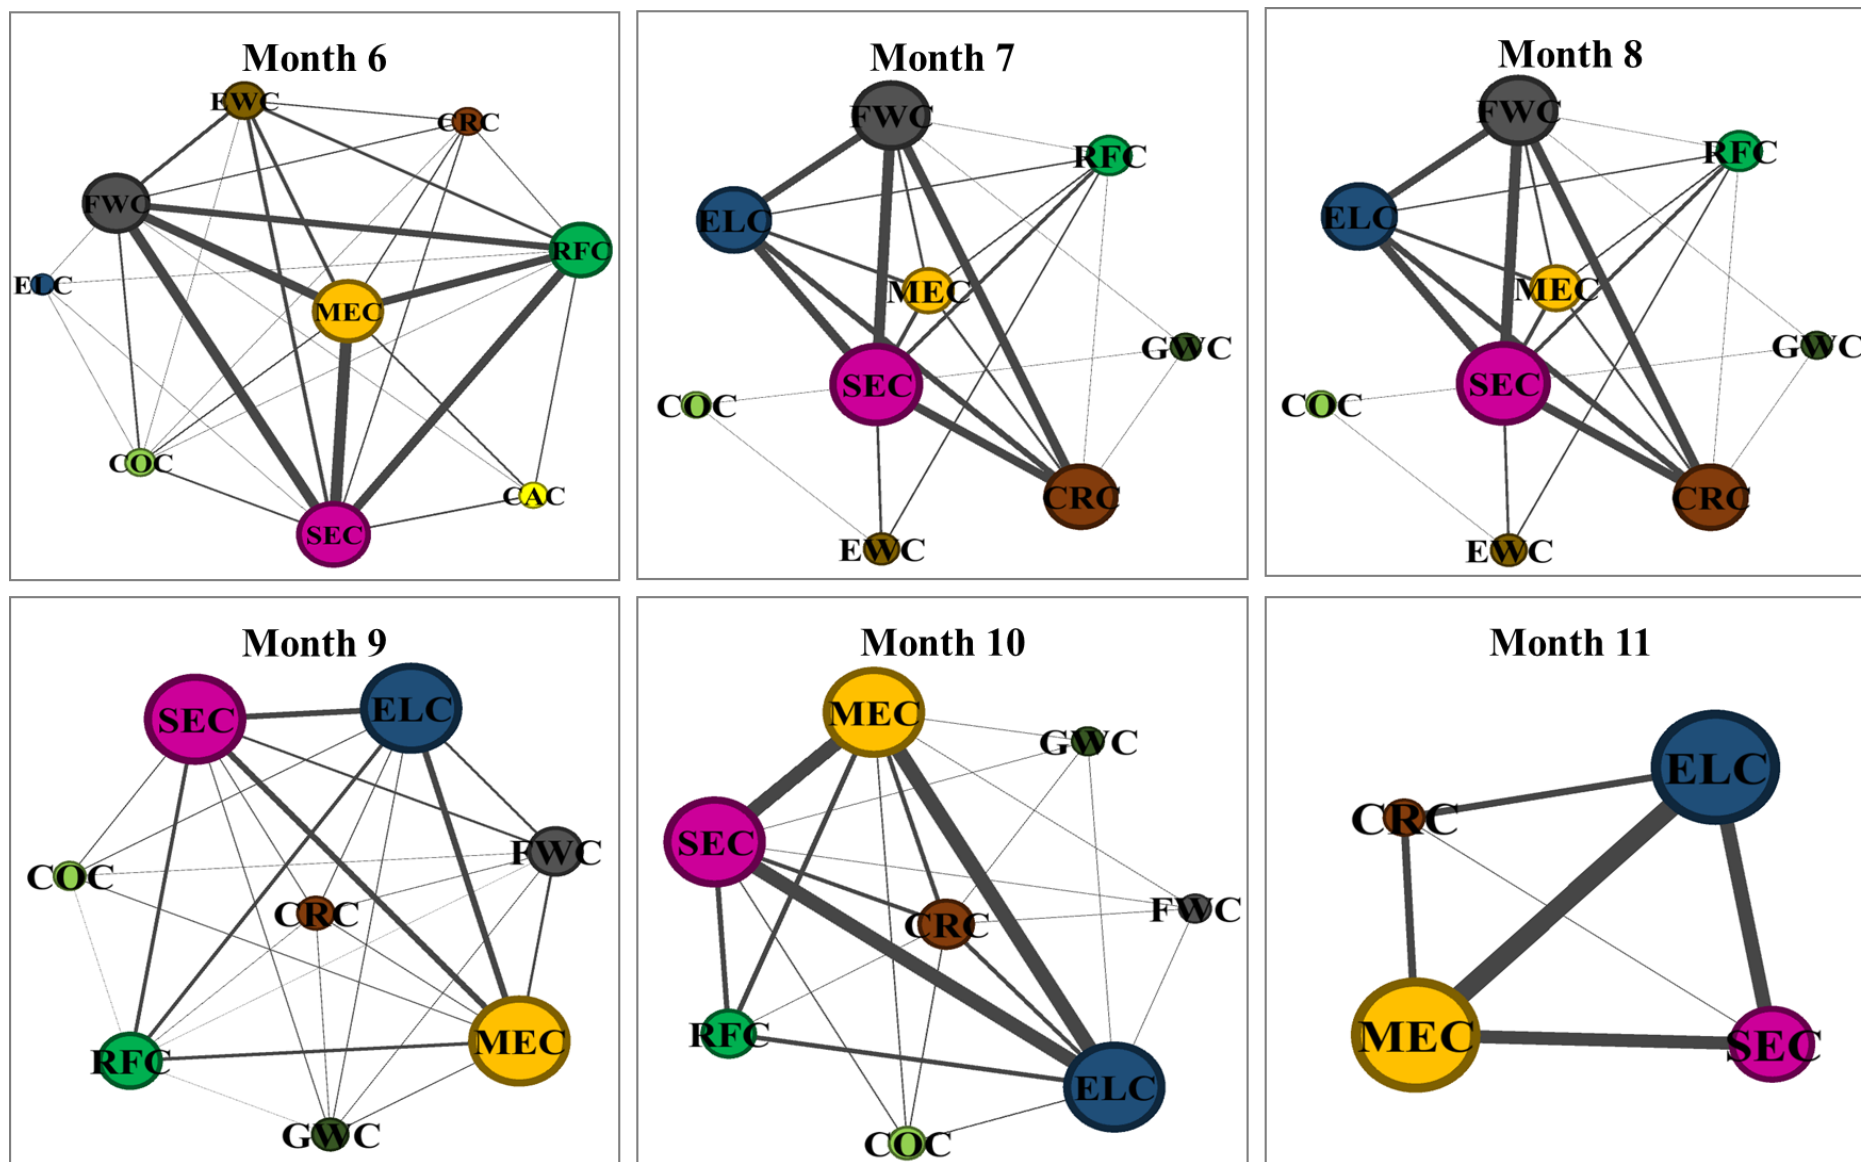

Fig. S2(b). Networks of months 6 to 11 of the project's duration.

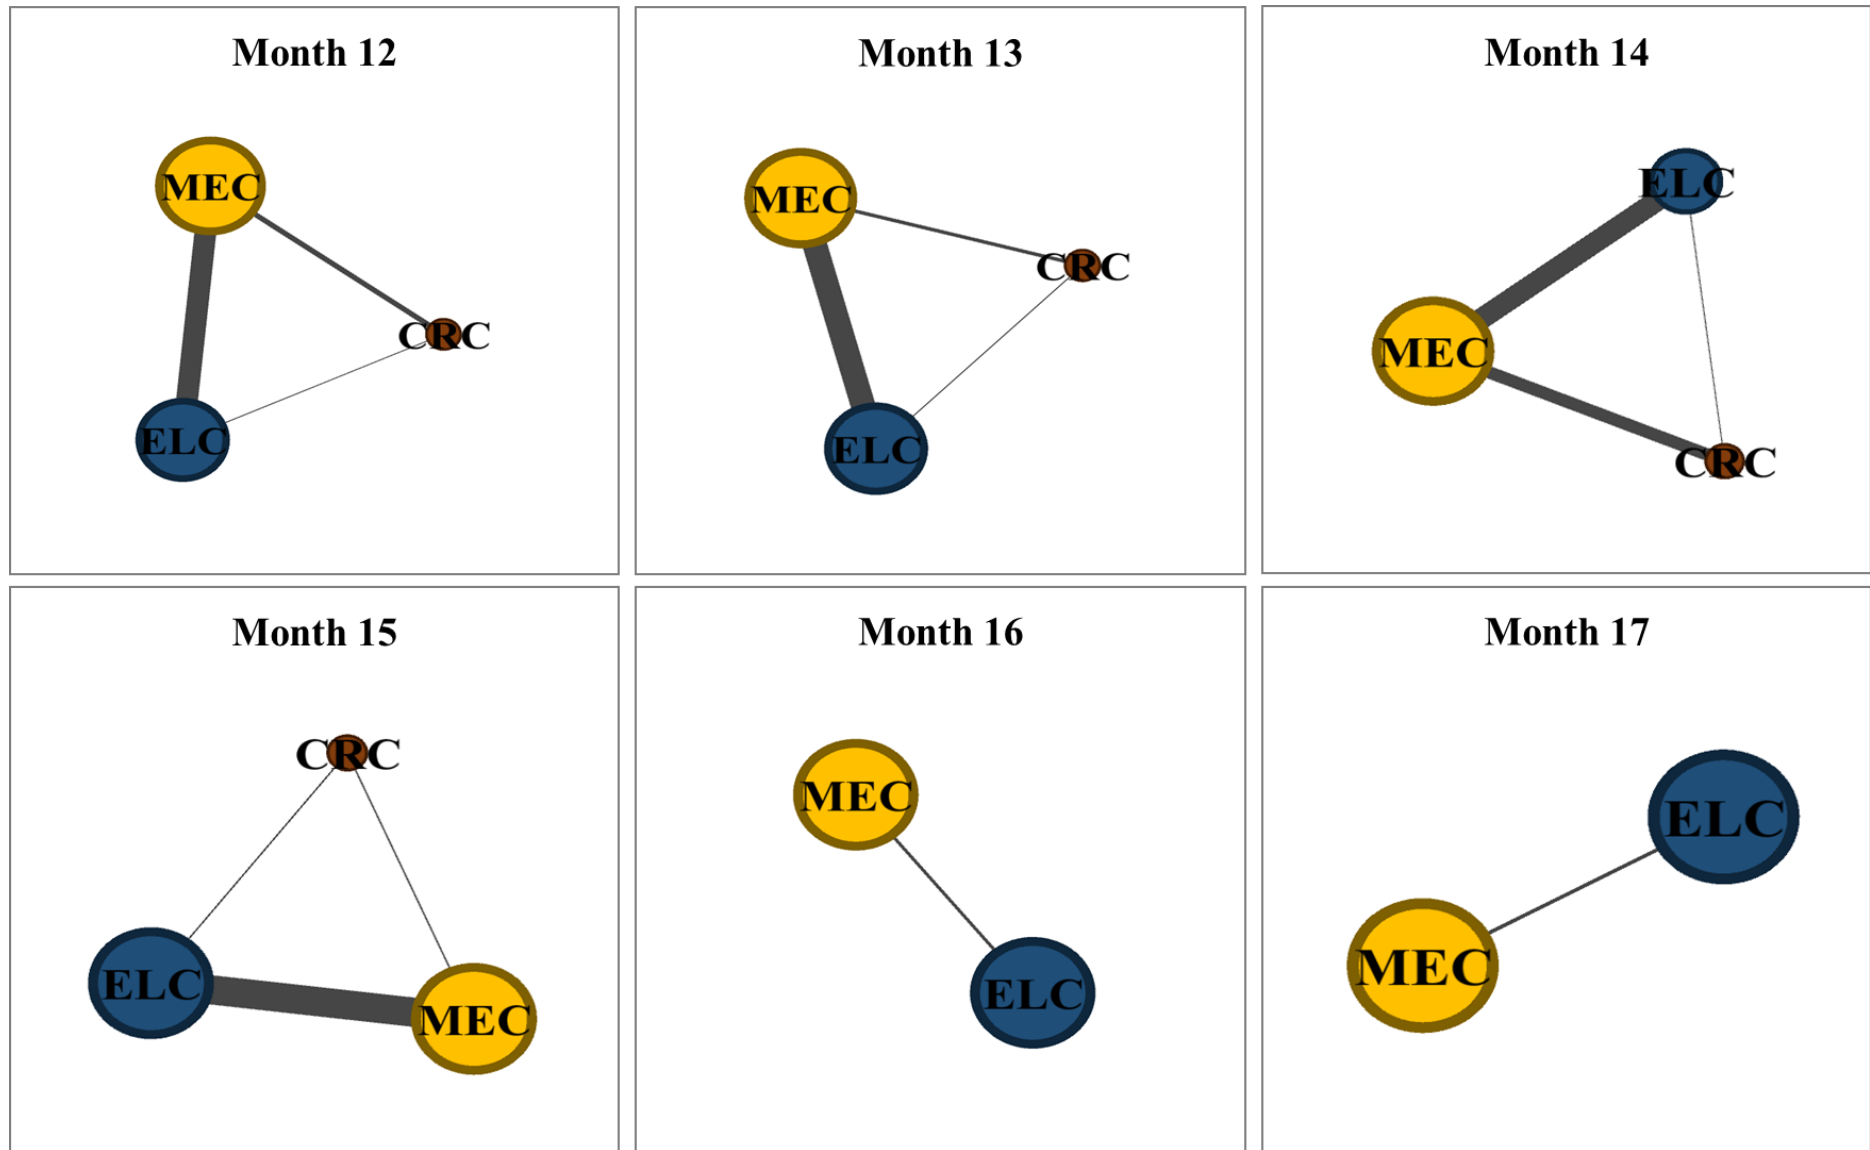

Fig. S2(c). Networks of months 12 to 17 of the project's duration.

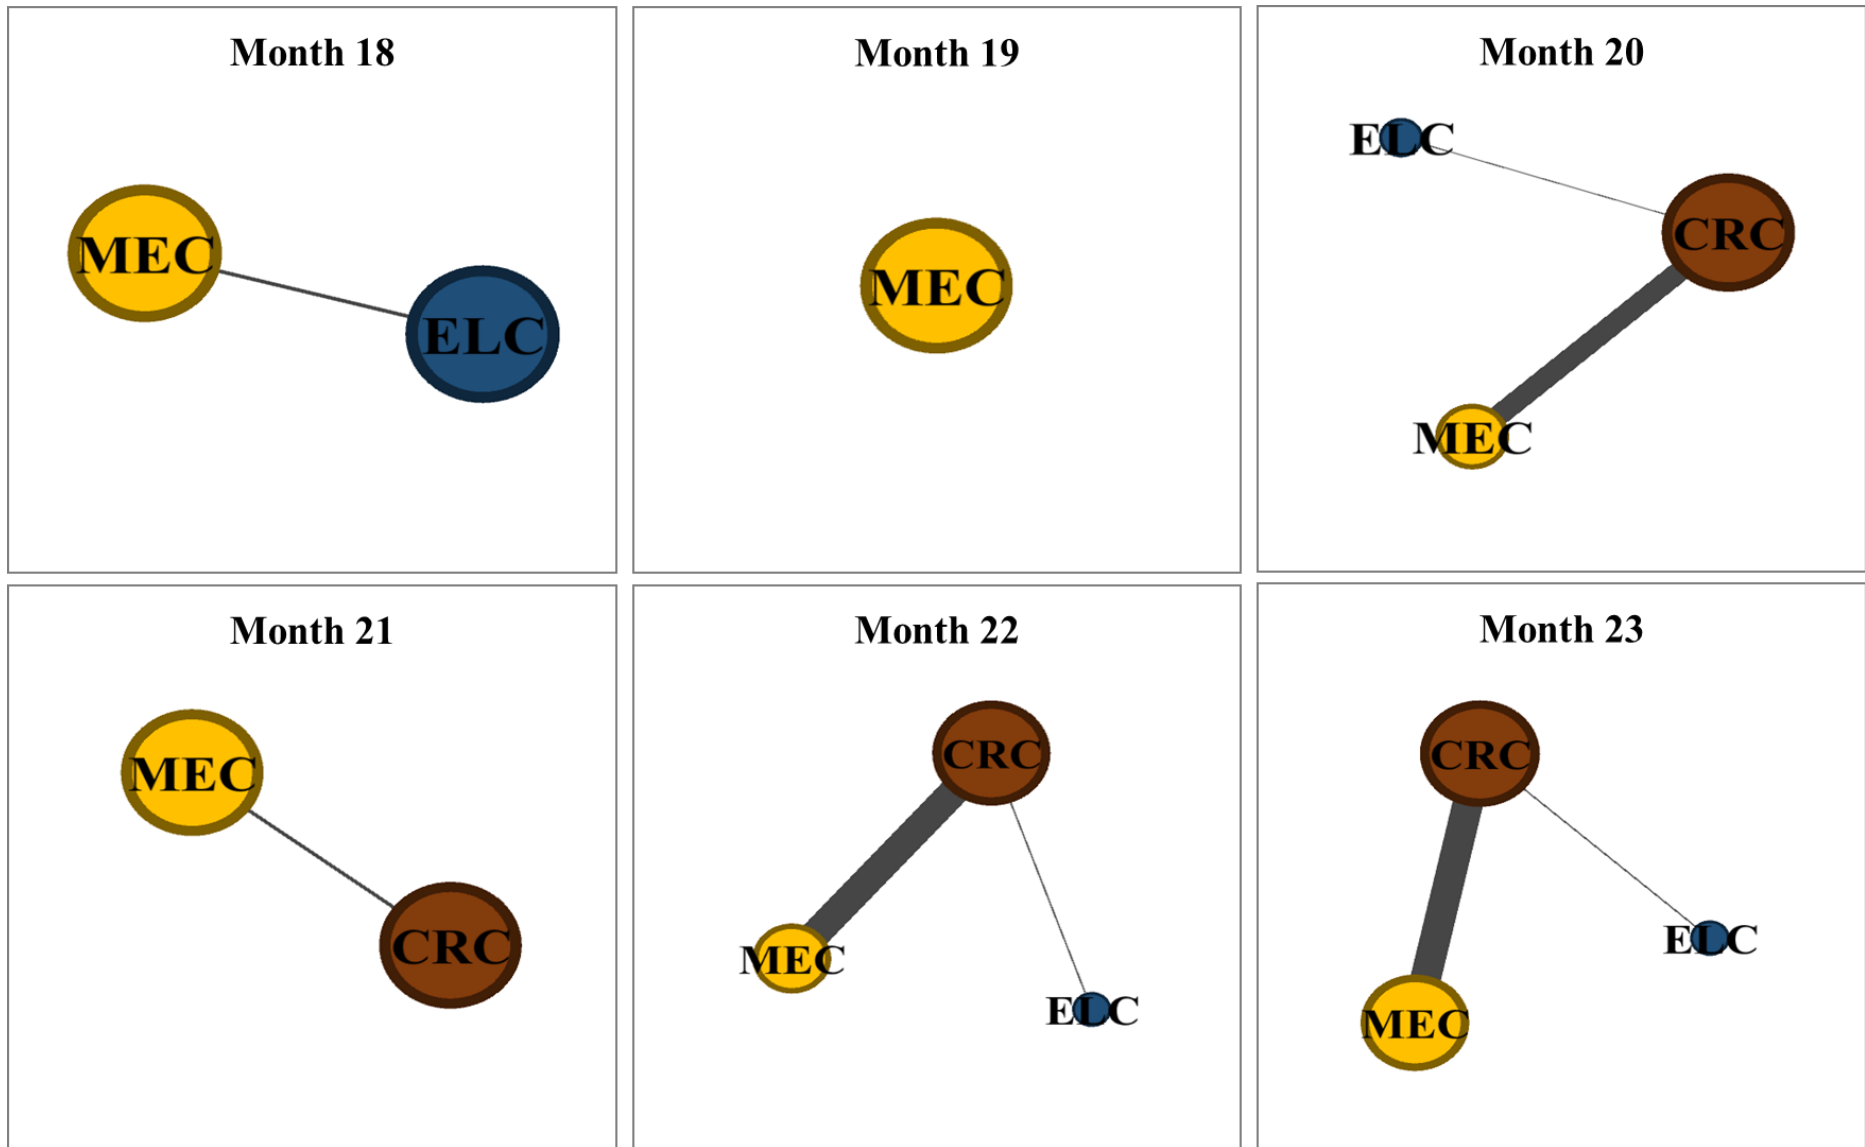

Fig. S2(d). Networks of months 18 to 23 of the project's duration.

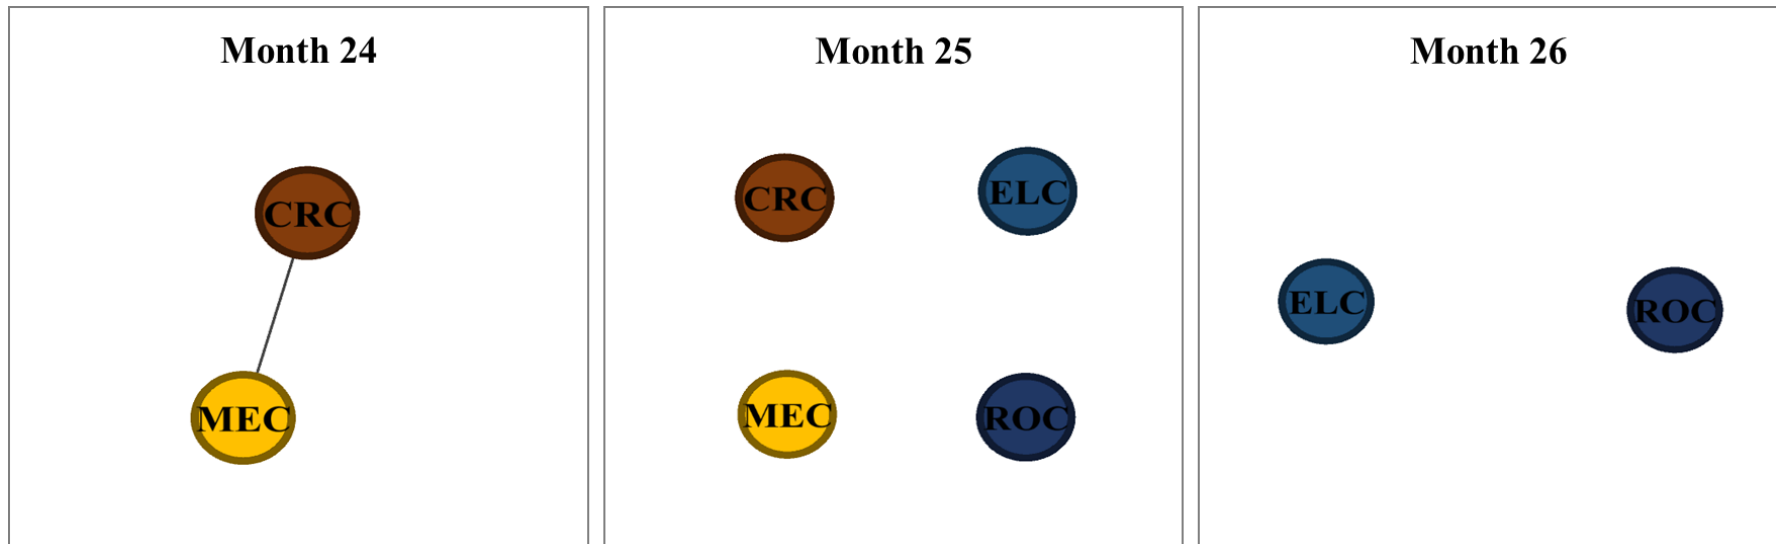

**Fig. S2(e).** Networks of months 24 to 26 of the project's duration.

**Table S1.** Activities with a non-zero free float

| <b>Contractor</b> | <b>Activity ID</b> | <b>Activity Name</b>     | <b>Original Duration</b> | <b>Start</b> | <b>Finish</b> | <b>Free Float</b> |
|-------------------|--------------------|--------------------------|--------------------------|--------------|---------------|-------------------|
| <b>CAC</b>        | A1200              | Coating                  | 2                        | 2021-03-30   | 2021-03-31    | 4                 |
| <b>CHC</b>        | A2700              | Erecting Chimney 3       | 8                        | 2021-05-10   | 2021-05-19    | 440               |
| <b>CRC</b>        | A1290              | Receiving Package 3      | 1                        | 2021-04-09   | 2021-04-09    | 14                |
|                   | A1360              | Receiving Package 3      | 1                        | 2021-04-14   | 2021-04-14    | 1                 |
|                   | A4040              | Receiving Boiler 3       | 2                        | 2021-08-26   | 2021-08-27    | 46                |
|                   | A2000              | Receiving Package 1      | 1                        | 2021-10-14   | 2021-10-14    | 24                |
|                   | A4280              | Receiving Feeder 3       | 2                        | 2021-11-04   | 2021-11-05    | 8                 |
|                   | A2010              | Receiving Package 2      | 1                        | 2021-11-18   | 2021-11-18    | 9                 |
|                   | A4210              | Receiving Condenser 3    | 2                        | 2021-12-09   | 2021-12-10    | 38                |
|                   | A1540              | Receiving Package 1      | 1                        | 2021-12-24   | 2021-12-24    | 21                |
|                   | A1920              | Receiving Package 1      | 1                        | 2022-01-05   | 2022-01-05    | 20                |
|                   | A1550              | Receiving Package 2      | 1                        | 2022-01-25   | 2022-01-25    | 21                |
|                   | A1930              | Receiving Package 2      | 1                        | 2022-02-03   | 2022-02-03    | 20                |
|                   | A4320              | Receiving Package 2      | 2                        | 2022-08-24   | 2022-08-25    | 3                 |
|                   | A2120              | Receiving of Package 2   | 1                        | 2022-09-01   | 2022-09-01    | 10                |
|                   | A2940              | Receiving Packages       | 3                        | 2021-05-26   | 2021-05-28    | 7                 |
|                   | A4950              | Receiving Packages       | 3                        | 2021-06-15   | 2021-06-17    | 18                |
|                   | A4700              | Receiving Generator 3    | 2                        | 2021-08-16   | 2021-08-17    | 24                |
|                   | A4740              | Receiving Switchers 3    | 2                        | 2021-10-15   | 2021-10-18    | 28                |
|                   | A4780              | Receiving Transformers 3 | 2                        | 2021-12-24   | 2021-12-27    | 14                |
| <b>ELC</b>        | A3910              | Electrical Finishes      | 3                        | 2021-06-30   | 2021-07-02    | 408               |
|                   | A4310              | Electrical Finishes      | 1                        | 2022-05-04   | 2022-05-04    | 79                |
|                   | A4250              | Electrical Finishes      | 1                        | 2022-06-13   | 2022-06-13    | 51                |
|                   | A4390              | Electrical Finishes      | 1                        | 2022-10-21   | 2022-10-21    | 20                |
|                   | A4820              | Electrical Finishes      | 3                        | 2022-03-31   | 2022-04-04    | 212               |
| <b>EWC</b>        | A4830              | Excavation               | 5                        | 2021-03-01   | 2021-03-05    | 41                |



|            |       |                                   |    |            |            |     |
|------------|-------|-----------------------------------|----|------------|------------|-----|
| <b>FWC</b> | A2400 | Shuttering                        | 5  | 2021-03-17 | 2021-03-23 | 1   |
|            | A2300 | Shuttering                        | 8  | 2021-03-25 | 2021-04-05 | 61  |
| <b>GWC</b> | A2380 | Finishes                          | 3  | 2021-09-27 | 2021-09-29 | 359 |
|            | A4440 | Finishes                          | 3  | 2021-09-27 | 2021-09-29 | 359 |
|            | A4490 | Finishes                          | 3  | 2021-09-27 | 2021-09-29 | 345 |
| <b>MEC</b> | A4050 | Installing Main Boiler 3          | 25 | 2021-11-02 | 2021-12-06 | 58  |
|            | A4170 | Mechanical Finishes               | 2  | 2022-05-19 | 2022-05-20 | 65  |
|            | A4590 | Mechanical Finishes               | 2  | 2022-12-14 | 2022-12-15 | 29  |
|            | A3020 | Installing Fire Protection System | 14 | 2021-11-22 | 2021-12-09 | 11  |
|            | A5010 | Installing Fire Protection System | 14 | 2021-12-27 | 2022-01-13 | 269 |
| <b>PIC</b> | A2390 | Installing Piles                  | 6  | 2021-02-24 | 2021-03-03 | 9   |
| <b>SIC</b> | A1330 | Erecting Silo 3                   | 5  | 2021-04-30 | 2021-05-06 | 449 |



|            |       |            |            |            |            |            |            |            |
|------------|-------|------------|------------|------------|------------|------------|------------|------------|
|            | A2300 | 2021-03-25 | 2021-06-18 | 2021-06-18 | 2021-06-18 | 2021-06-18 | 2021-06-18 | 2021-06-18 |
| <b>GWC</b> | A2380 | 2021-09-27 | 2023-02-10 | 2023-02-10 | 2023-02-10 | 2023-02-10 | 2023-02-10 | 2023-02-10 |
|            | A4440 | 2021-09-27 | 2023-02-10 | 2023-02-10 | 2023-02-10 | 2023-02-10 | 2023-02-10 | 2023-02-10 |
|            | A4490 | 2021-09-27 | 2023-01-23 | 2023-01-23 | 2023-01-23 | 2023-01-23 | 2023-01-23 | 2023-01-23 |
| <b>MEC</b> | A4050 | 2021-11-02 | 2022-01-21 | 2022-01-21 | 2022-01-21 | 2022-01-21 | 2022-01-21 | 2022-01-21 |
|            | A4170 | 2022-05-19 | 2022-08-18 | 2022-08-18 | 2022-08-18 | 2022-08-18 | 2022-08-18 | 2022-08-18 |
|            | A4590 | 2022-12-14 | 2023-01-24 | 2023-01-24 | 2023-01-24 | 2023-01-24 | 2023-01-24 | 2023-01-24 |
|            | A3020 | 2021-11-22 | 2021-12-07 | 2021-12-07 | 2021-12-07 | 2021-12-07 | 2021-12-07 | 2021-12-07 |
|            | A5010 | 2021-12-27 | 2023-01-06 | 2023-01-06 | 2023-01-06 | 2023-01-06 | 2023-01-06 | 2023-01-06 |
| <b>PIC</b> | A2390 | 2021-02-24 | 2021-03-09 | 2021-03-09 | 2021-03-09 | 2021-03-09 | 2021-03-09 | 2021-03-09 |
| <b>SIC</b> | A1330 | 2021-04-30 | 2023-01-19 | 2023-01-19 | 2023-01-19 | 2023-01-19 | 2023-01-19 | 2023-01-19 |

Table S3. Project schedule

|                                           |                                       |                   | Work Breakdown Structure Schedule |                                       |            |     |            |     |     |            |     |     |            |     | Power Plant Project |            |     |     |            |     |     |            |     |     |            |     |     |            |     |     |  |  |  |  |  |
|-------------------------------------------|---------------------------------------|-------------------|-----------------------------------|---------------------------------------|------------|-----|------------|-----|-----|------------|-----|-----|------------|-----|---------------------|------------|-----|-----|------------|-----|-----|------------|-----|-----|------------|-----|-----|------------|-----|-----|--|--|--|--|--|
| Activity ID                               | Activity Name                         | Original Duration | Start                             | Qr 1, 2021                            |            |     | Qr 2, 2021 |     |     | Qr 3, 2021 |     |     | Qr 4, 2021 |     |                     | Qr 1, 2022 |     |     | Qr 2, 2022 |     |     | Qr 3, 2022 |     |     | Qr 4, 2022 |     |     | Qr 1, 2023 |     |     |  |  |  |  |  |
|                                           |                                       |                   |                                   | Jan                                   | Feb        | Mar | Apr        | May | Jun | Jul        | Aug | Sep | Oct        | Nov | Dec                 | Jan        | Feb | Mar | Apr        | May | Jun | Jul        | Aug | Sep | Oct        | Nov | Dec | Jan        | Feb | Mar |  |  |  |  |  |
| <b>PowerPlantX</b>                        |                                       |                   |                                   | 556                                   | 01-01-2021 |     |            |     |     |            |     |     |            |     |                     |            |     |     |            |     |     |            |     |     |            |     |     |            |     |     |  |  |  |  |  |
| <b>Site Preparation</b>                   |                                       |                   |                                   | 33                                    | 01-01-2021 |     |            |     |     |            |     |     |            |     |                     |            |     |     |            |     |     |            |     |     |            |     |     |            |     |     |  |  |  |  |  |
| <b>Soil Tests and Inspections</b>         |                                       |                   |                                   | 8                                     | 01-01-2021 |     |            |     |     |            |     |     |            |     |                     |            |     |     |            |     |     |            |     |     |            |     |     |            |     |     |  |  |  |  |  |
| A1000                                     | Soil Tests                            | 8                 | 01-01-2021                        | Soil Tests                            |            |     |            |     |     |            |     |     |            |     |                     |            |     |     |            |     |     |            |     |     |            |     |     |            |     |     |  |  |  |  |  |
| <b>Construction Equipment Inspections</b> |                                       |                   |                                   | 8                                     | 13-01-2021 |     |            |     |     |            |     |     |            |     |                     |            |     |     |            |     |     |            |     |     |            |     |     |            |     |     |  |  |  |  |  |
| A1010                                     | Inspecting Construction Equipment     | 8                 | 13-01-2021*                       | Inspecting Construction Equipment     |            |     |            |     |     |            |     |     |            |     |                     |            |     |     |            |     |     |            |     |     |            |     |     |            |     |     |  |  |  |  |  |
| <b>Site Preparation</b>                   |                                       |                   |                                   | 12                                    | 25-01-2021 |     |            |     |     |            |     |     |            |     |                     |            |     |     |            |     |     |            |     |     |            |     |     |            |     |     |  |  |  |  |  |
| A1120                                     | Grading Site and Temporary Roads      | 8                 | 29-01-2021                        | Grading Site and Temporary Roads      |            |     |            |     |     |            |     |     |            |     |                     |            |     |     |            |     |     |            |     |     |            |     |     |            |     |     |  |  |  |  |  |
| A1020                                     | Fencing                               | 4                 | 25-01-2021                        | Fencing                               |            |     |            |     |     |            |     |     |            |     |                     |            |     |     |            |     |     |            |     |     |            |     |     |            |     |     |  |  |  |  |  |
| <b>Storage Area</b>                       |                                       |                   |                                   | 5                                     | 10-02-2021 |     |            |     |     |            |     |     |            |     |                     |            |     |     |            |     |     |            |     |     |            |     |     |            |     |     |  |  |  |  |  |
| A1030                                     | Preparing Storage Area                | 5                 | 10-02-2021                        | Preparing Storage Area                |            |     |            |     |     |            |     |     |            |     |                     |            |     |     |            |     |     |            |     |     |            |     |     |            |     |     |  |  |  |  |  |
| <b>Health and Safety Permissions</b>      |                                       |                   |                                   | 5                                     | 10-02-2021 |     |            |     |     |            |     |     |            |     |                     |            |     |     |            |     |     |            |     |     |            |     |     |            |     |     |  |  |  |  |  |
| A1040                                     | Installing Signage and Lights         | 5                 | 10-02-2021                        | Installing Signage and Lights         |            |     |            |     |     |            |     |     |            |     |                     |            |     |     |            |     |     |            |     |     |            |     |     |            |     |     |  |  |  |  |  |
| <b>Roadways</b>                           |                                       |                   |                                   | 14                                    | 31-01-2023 |     |            |     |     |            |     |     |            |     |                     |            |     |     |            |     |     |            |     |     |            |     |     |            |     |     |  |  |  |  |  |
| <b>Civil Works</b>                        |                                       |                   |                                   | 8                                     | 31-01-2023 |     |            |     |     |            |     |     |            |     |                     |            |     |     |            |     |     |            |     |     |            |     |     |            |     |     |  |  |  |  |  |
| A1050                                     | Sub Grade                             | 4                 | 31-01-2023                        | Sub Grade                             |            |     |            |     |     |            |     |     |            |     |                     |            |     |     |            |     |     |            |     |     |            |     |     |            |     |     |  |  |  |  |  |
| A1070                                     | Asphalt Layer 2 (70 cm)               | 2                 | 08-02-2023                        | Asphalt Layer                         |            |     |            |     |     |            |     |     |            |     |                     |            |     |     |            |     |     |            |     |     |            |     |     |            |     |     |  |  |  |  |  |
| A1060                                     | Asphalt Layer 1 (50 cm)               | 2                 | 06-02-2023                        | Asphalt Layer                         |            |     |            |     |     |            |     |     |            |     |                     |            |     |     |            |     |     |            |     |     |            |     |     |            |     |     |  |  |  |  |  |
| <b>Electrical Works</b>                   |                                       |                   |                                   | 6                                     | 10-02-2023 |     |            |     |     |            |     |     |            |     |                     |            |     |     |            |     |     |            |     |     |            |     |     |            |     |     |  |  |  |  |  |
| A3660                                     | Installing Light Poles                | 4                 | 10-02-2023                        | Installing Light Poles                |            |     |            |     |     |            |     |     |            |     |                     |            |     |     |            |     |     |            |     |     |            |     |     |            |     |     |  |  |  |  |  |
| A3670                                     | Installing Light Poles Cables         | 2                 | 16-02-2023                        | Installing Light Poles                |            |     |            |     |     |            |     |     |            |     |                     |            |     |     |            |     |     |            |     |     |            |     |     |            |     |     |  |  |  |  |  |
| <b>Coal Handling and Storage System</b>   |                                       |                   |                                   | 98                                    | 17-02-2021 |     |            |     |     |            |     |     |            |     |                     |            |     |     |            |     |     |            |     |     |            |     |     |            |     |     |  |  |  |  |  |
| <b>Civil Works</b>                        |                                       |                   |                                   | 66                                    | 17-02-2021 |     |            |     |     |            |     |     |            |     |                     |            |     |     |            |     |     |            |     |     |            |     |     |            |     |     |  |  |  |  |  |
| <b>Earthworks</b>                         |                                       |                   |                                   | 42                                    | 17-02-2021 |     |            |     |     |            |     |     |            |     |                     |            |     |     |            |     |     |            |     |     |            |     |     |            |     |     |  |  |  |  |  |
| A1080                                     | Excavation                            | 5                 | 17-02-2021                        | Excavation                            |            |     |            |     |     |            |     |     |            |     |                     |            |     |     |            |     |     |            |     |     |            |     |     |            |     |     |  |  |  |  |  |
| A1100                                     | Compaction                            | 4                 | 12-04-2021                        | Compaction                            |            |     |            |     |     |            |     |     |            |     |                     |            |     |     |            |     |     |            |     |     |            |     |     |            |     |     |  |  |  |  |  |
| A1090                                     | Filling                               | 3                 | 07-04-2021                        | Filling                               |            |     |            |     |     |            |     |     |            |     |                     |            |     |     |            |     |     |            |     |     |            |     |     |            |     |     |  |  |  |  |  |
| <b>Foundations</b>                        |                                       |                   |                                   | 30                                    | 24-02-2021 |     |            |     |     |            |     |     |            |     |                     |            |     |     |            |     |     |            |     |     |            |     |     |            |     |     |  |  |  |  |  |
| <b>PC Footing</b>                         |                                       |                   |                                   | 26                                    | 24-02-2021 |     |            |     |     |            |     |     |            |     |                     |            |     |     |            |     |     |            |     |     |            |     |     |            |     |     |  |  |  |  |  |
| A1110                                     | Shuttering                            | 6                 | 24-02-2021                        | Shuttering                            |            |     |            |     |     |            |     |     |            |     |                     |            |     |     |            |     |     |            |     |     |            |     |     |            |     |     |  |  |  |  |  |
| A1150                                     | Coating                               | 2                 | 30-03-2021                        | Coating                               |            |     |            |     |     |            |     |     |            |     |                     |            |     |     |            |     |     |            |     |     |            |     |     |            |     |     |  |  |  |  |  |
| A1130                                     | Concrete Casting                      | 2                 | 04-03-2021                        | Concrete Casting                      |            |     |            |     |     |            |     |     |            |     |                     |            |     |     |            |     |     |            |     |     |            |     |     |            |     |     |  |  |  |  |  |
| A1140                                     | Deshuttering                          | 1                 | 08-03-2021                        | Deshuttering                          |            |     |            |     |     |            |     |     |            |     |                     |            |     |     |            |     |     |            |     |     |            |     |     |            |     |     |  |  |  |  |  |
| <b>RC Footing</b>                         |                                       |                   |                                   | 17                                    | 09-03-2021 |     |            |     |     |            |     |     |            |     |                     |            |     |     |            |     |     |            |     |     |            |     |     |            |     |     |  |  |  |  |  |
| A1170                                     | RFT Placement                         | 6                 | 17-03-2021                        | RFT Placement                         |            |     |            |     |     |            |     |     |            |     |                     |            |     |     |            |     |     |            |     |     |            |     |     |            |     |     |  |  |  |  |  |
| A1160                                     | Shuttering                            | 6                 | 09-03-2021                        | Shuttering                            |            |     |            |     |     |            |     |     |            |     |                     |            |     |     |            |     |     |            |     |     |            |     |     |            |     |     |  |  |  |  |  |
| A1200                                     | Coating                               | 2                 | 30-03-2021                        | Coating                               |            |     |            |     |     |            |     |     |            |     |                     |            |     |     |            |     |     |            |     |     |            |     |     |            |     |     |  |  |  |  |  |
| A1180                                     | Concrete Casting                      | 2                 | 25-03-2021                        | Concrete Casting                      |            |     |            |     |     |            |     |     |            |     |                     |            |     |     |            |     |     |            |     |     |            |     |     |            |     |     |  |  |  |  |  |
| A1190                                     | Deshuttering                          | 1                 | 29-03-2021                        | Deshuttering                          |            |     |            |     |     |            |     |     |            |     |                     |            |     |     |            |     |     |            |     |     |            |     |     |            |     |     |  |  |  |  |  |
| <b>Piles</b>                              |                                       |                   |                                   | 30                                    | 24-02-2021 |     |            |     |     |            |     |     |            |     |                     |            |     |     |            |     |     |            |     |     |            |     |     |            |     |     |  |  |  |  |  |
| A2390                                     | Installing Piles                      | 6                 | 24-02-2021                        | Installing Piles                      |            |     |            |     |     |            |     |     |            |     |                     |            |     |     |            |     |     |            |     |     |            |     |     |            |     |     |  |  |  |  |  |
| A2410                                     | RFT Placement                         | 5                 | 25-03-2021                        | RFT Placement                         |            |     |            |     |     |            |     |     |            |     |                     |            |     |     |            |     |     |            |     |     |            |     |     |            |     |     |  |  |  |  |  |
| A2400                                     | Shuttering                            | 5                 | 17-03-2021                        | Shuttering                            |            |     |            |     |     |            |     |     |            |     |                     |            |     |     |            |     |     |            |     |     |            |     |     |            |     |     |  |  |  |  |  |
| A2440                                     | Coating                               | 2                 | 05-04-2021                        | Coating                               |            |     |            |     |     |            |     |     |            |     |                     |            |     |     |            |     |     |            |     |     |            |     |     |            |     |     |  |  |  |  |  |
| A2430                                     | Deshuttering                          | 1                 | 02-04-2021                        | Deshuttering                          |            |     |            |     |     |            |     |     |            |     |                     |            |     |     |            |     |     |            |     |     |            |     |     |            |     |     |  |  |  |  |  |
| A2420                                     | Concrete Casting                      | 1                 | 01-04-2021                        | Concrete Casting                      |            |     |            |     |     |            |     |     |            |     |                     |            |     |     |            |     |     |            |     |     |            |     |     |            |     |     |  |  |  |  |  |
| <b>Silos</b>                              |                                       |                   |                                   | 22                                    | 07-04-2021 |     |            |     |     |            |     |     |            |     |                     |            |     |     |            |     |     |            |     |     |            |     |     |            |     |     |  |  |  |  |  |
| A1330                                     | Erecting Silo 3                       | 5                 | 30-04-2021                        | Erecting Silo 3                       |            |     |            |     |     |            |     |     |            |     |                     |            |     |     |            |     |     |            |     |     |            |     |     |            |     |     |  |  |  |  |  |
| A1320                                     | Erecting Silo 2                       | 5                 | 23-04-2021                        | Erecting Silo 2                       |            |     |            |     |     |            |     |     |            |     |                     |            |     |     |            |     |     |            |     |     |            |     |     |            |     |     |  |  |  |  |  |
| A1310                                     | Erecting Silo 1                       | 5                 | 16-04-2021                        | Erecting Silo 1                       |            |     |            |     |     |            |     |     |            |     |                     |            |     |     |            |     |     |            |     |     |            |     |     |            |     |     |  |  |  |  |  |
| A1290                                     | Receiving Package 3                   | 1                 | 09-04-2021                        | Receiving Package 3                   |            |     |            |     |     |            |     |     |            |     |                     |            |     |     |            |     |     |            |     |     |            |     |     |            |     |     |  |  |  |  |  |
| A1280                                     | Receiving Package 2                   | 1                 | 08-04-2021                        | Receiving Package 2                   |            |     |            |     |     |            |     |     |            |     |                     |            |     |     |            |     |     |            |     |     |            |     |     |            |     |     |  |  |  |  |  |
| A1270                                     | Receiving Package 1                   | 1                 | 07-04-2021                        | Receiving Package 1                   |            |     |            |     |     |            |     |     |            |     |                     |            |     |     |            |     |     |            |     |     |            |     |     |            |     |     |  |  |  |  |  |
| <b>Chimneys</b>                           |                                       |                   |                                   | 31                                    | 07-04-2021 |     |            |     |     |            |     |     |            |     |                     |            |     |     |            |     |     |            |     |     |            |     |     |            |     |     |  |  |  |  |  |
| A2700                                     | Erecting Chimney 3                    | 8                 | 10-05-2021                        | Erecting Chimney 3                    |            |     |            |     |     |            |     |     |            |     |                     |            |     |     |            |     |     |            |     |     |            |     |     |            |     |     |  |  |  |  |  |
| A2610                                     | Erecting Chimney 2                    | 8                 | 28-04-2021                        | Erecting Chimney 2                    |            |     |            |     |     |            |     |     |            |     |                     |            |     |     |            |     |     |            |     |     |            |     |     |            |     |     |  |  |  |  |  |
| A2490                                     | Erecting Chimney 1                    | 8                 | 16-04-2021                        | Erecting Chimney 1                    |            |     |            |     |     |            |     |     |            |     |                     |            |     |     |            |     |     |            |     |     |            |     |     |            |     |     |  |  |  |  |  |
| A2470                                     | Receiving Package 3                   | 1                 | 09-04-2021                        | Receiving Package 3                   |            |     |            |     |     |            |     |     |            |     |                     |            |     |     |            |     |     |            |     |     |            |     |     |            |     |     |  |  |  |  |  |
| A2460                                     | Receiving Package 2                   | 1                 | 08-04-2021                        | Receiving Package 2                   |            |     |            |     |     |            |     |     |            |     |                     |            |     |     |            |     |     |            |     |     |            |     |     |            |     |     |  |  |  |  |  |
| A2450                                     | Receiving Package 1                   | 1                 | 07-04-2021                        | Receiving Package 1                   |            |     |            |     |     |            |     |     |            |     |                     |            |     |     |            |     |     |            |     |     |            |     |     |            |     |     |  |  |  |  |  |
| <b>Mechanical Works</b>                   |                                       |                   |                                   | 60                                    | 12-04-2021 |     |            |     |     |            |     |     |            |     |                     |            |     |     |            |     |     |            |     |     |            |     |     |            |     |     |  |  |  |  |  |
| A3600                                     | Installing Dust Control System        | 15                | 02-06-2021                        | Installing Dust Control System        |            |     |            |     |     |            |     |     |            |     |                     |            |     |     |            |     |     |            |     |     |            |     |     |            |     |     |  |  |  |  |  |
| A1810                                     | Installing Built Conveyors            | 9                 | 12-05-2021                        | Installing Built Conveyors            |            |     |            |     |     |            |     |     |            |     |                     |            |     |     |            |     |     |            |     |     |            |     |     |            |     |     |  |  |  |  |  |
| A1380                                     | Installing Feeders                    | 9                 | 29-04-2021                        | Installing Feeders                    |            |     |            |     |     |            |     |     |            |     |                     |            |     |     |            |     |     |            |     |     |            |     |     |            |     |     |  |  |  |  |  |
| A1370                                     | Installing Track-Truck Hoppers        | 9                 | 16-04-2021                        | Installing Track-Truck Hoppers        |            |     |            |     |     |            |     |     |            |     |                     |            |     |     |            |     |     |            |     |     |            |     |     |            |     |     |  |  |  |  |  |
| A3900                                     | Mechanical Finishes                   | 5                 | 23-06-2021                        | Mechanical Finishes                   |            |     |            |     |     |            |     |     |            |     |                     |            |     |     |            |     |     |            |     |     |            |     |     |            |     |     |  |  |  |  |  |
| A3910                                     | Electrical Finishes                   | 3                 | 30-06-2021                        | Electrical Finishes                   |            |     |            |     |     |            |     |     |            |     |                     |            |     |     |            |     |     |            |     |     |            |     |     |            |     |     |  |  |  |  |  |
| A3260                                     | Installing Spouts and Chauts          | 3                 | 28-05-2021                        | Installing Spouts and Chauts          |            |     |            |     |     |            |     |     |            |     |                     |            |     |     |            |     |     |            |     |     |            |     |     |            |     |     |  |  |  |  |  |
| A2710                                     | Installing Bucket Elevator and Feeder | 3                 | 25-05-2021                        | Installing Bucket Elevator and Feeder |            |     |            |     |     |            |     |     |            |     |                     |            |     |     |            |     |     |            |     |     |            |     |     |            |     |     |  |  |  |  |  |
| A1360                                     | Receiving Package 3                   | 1                 | 14-04-2021                        | Receiving Package 3                   |            |     |            |     |     |            |     |     |            |     |                     |            |     |     |            |     |     |            |     |     |            |     |     |            |     |     |  |  |  |  |  |
| A1350                                     | Receiving Package 2                   | 1                 | 13-04-2021                        | Receiving Package 2                   |            |     |            |     |     |            |     |     |            |     |                     |            |     |     |            |     |     |            |     |     |            |     |     |            |     |     |  |  |  |  |  |
| A1340                                     | Receiving Package 1                   | 1                 | 12-04-2021                        | Receiving Package 1                   |            |     |            |     |     |            |     |     |            |     |                     |            |     |     |            |     |     |            |     |     |            |     |     |            |     |     |  |  |  |  |  |
| <b>Steam Generator System</b>             |                                       |                   |                                   | 392                                   | 24-02-2021 |     |            |     |     |            |     |     |            |     |                     |            |     |     |            |     |     |            |     |     |            |     |     |            |     |     |  |  |  |  |  |
| <b>Civil Works</b>                        |                                       |                   |                                   | 129                                   | 24-02-2021 |     |            |     |     |            |     |     |            |     |                     |            |     |     |            |     |     |            |     |     |            |     |     |            |     |     |  |  |  |  |  |
| <b>Earthworks</b>                         |                                       |                   |                                   | 61                                    | 24-02-2021 |     |            |     |     |            |     |     |            |     |                     |            |     |     |            |     |     |            |     |     |            |     |     |            |     |     |  |  |  |  |  |

Actual Work Remaining Work Critical Remaining Work

| Activity ID                    | Activity Name                            | Original Duration | Start      | Qtr 1, 2021 |     |     | Qtr 2, 2021 |     |     | Qtr 3, 2021 |     |     | Qtr 4, 2021 |     |     | Qtr 1, 2022 |     |     | Qtr 2, 2022 |     |     | Qtr 3, 2022 |     |     | Qtr 4, 2022 |     |     | Qtr 1, 2023 |     |     |
|--------------------------------|------------------------------------------|-------------------|------------|-------------|-----|-----|-------------|-----|-----|-------------|-----|-----|-------------|-----|-----|-------------|-----|-----|-------------|-----|-----|-------------|-----|-----|-------------|-----|-----|-------------|-----|-----|
|                                |                                          |                   |            | Jan         | Feb | Mar | Apr         | May | Jun | Jul         | Aug | Sep | Oct         | Nov | Dec | Jan         | Feb | Mar | Apr         | May | Jun | Jul         | Aug | Sep | Oct         | Nov | Dec | Jan         | Feb | Mar |
| A1390                          | Excavation                               | 5                 | 24-02-2021 |             |     | █   | Excavation  |     |     |             |     |     |             |     |     |             |     |     |             |     |     |             |     |     |             |     |     |             |     |     |
| A1410                          | Compaction                               | 4                 | 14-05-2021 |             |     |     |             |     |     |             |     |     |             |     |     |             |     |     |             |     |     |             |     |     |             |     |     |             |     |     |
| A1400                          | Filing                                   | 3                 | 17-05-2021 |             |     |     |             |     |     |             |     |     |             |     |     |             |     |     |             |     |     |             |     |     |             |     |     |             |     |     |
| <b>Foundations</b>             |                                          | 44                | 17-03-2021 |             |     |     |             |     |     |             |     |     |             |     |     |             |     |     |             |     |     |             |     |     |             |     |     |             |     |     |
| <b>PCFoundations</b>           |                                          | 44                | 17-03-2021 |             |     |     |             |     |     |             |     |     |             |     |     |             |     |     |             |     |     |             |     |     |             |     |     |             |     |     |
| A1420                          | Shuttering                               | 9                 | 17-03-2021 |             |     |     |             |     |     |             |     |     |             |     |     |             |     |     |             |     |     |             |     |     |             |     |     |             |     |     |
| A1460                          | Coating                                  | 2                 | 14-05-2021 |             |     |     |             |     |     |             |     |     |             |     |     |             |     |     |             |     |     |             |     |     |             |     |     |             |     |     |
| A1440                          | Concrete Casting                         | 2                 | 30-03-2021 |             |     |     |             |     |     |             |     |     |             |     |     |             |     |     |             |     |     |             |     |     |             |     |     |             |     |     |
| A1450                          | Deshuttering                             | 1                 | 01-04-2021 |             |     |     |             |     |     |             |     |     |             |     |     |             |     |     |             |     |     |             |     |     |             |     |     |             |     |     |
| <b>RCFoundations</b>           |                                          | 32                | 02-04-2021 |             |     |     |             |     |     |             |     |     |             |     |     |             |     |     |             |     |     |             |     |     |             |     |     |             |     |     |
| A1480                          | RFT Placement                            | 9                 | 15-04-2021 |             |     |     |             |     |     |             |     |     |             |     |     |             |     |     |             |     |     |             |     |     |             |     |     |             |     |     |
| A1470                          | Shuttering                               | 9                 | 02-04-2021 |             |     |     |             |     |     |             |     |     |             |     |     |             |     |     |             |     |     |             |     |     |             |     |     |             |     |     |
| A1510                          | Coating                                  | 2                 | 14-05-2021 |             |     |     |             |     |     |             |     |     |             |     |     |             |     |     |             |     |     |             |     |     |             |     |     |             |     |     |
| A1490                          | Concrete Casting                         | 2                 | 28-04-2021 |             |     |     |             |     |     |             |     |     |             |     |     |             |     |     |             |     |     |             |     |     |             |     |     |             |     |     |
| A1500                          | Deshuttering                             | 1                 | 30-04-2021 |             |     |     |             |     |     |             |     |     |             |     |     |             |     |     |             |     |     |             |     |     |             |     |     |             |     |     |
| <b>Boiler Special Footing</b>  |                                          | 10                | 03-05-2021 |             |     |     |             |     |     |             |     |     |             |     |     |             |     |     |             |     |     |             |     |     |             |     |     |             |     |     |
| A3980                          | RFT Placement                            | 3                 | 06-05-2021 |             |     |     |             |     |     |             |     |     |             |     |     |             |     |     |             |     |     |             |     |     |             |     |     |             |     |     |
| A3970                          | Shuttering                               | 3                 | 03-05-2021 |             |     |     |             |     |     |             |     |     |             |     |     |             |     |     |             |     |     |             |     |     |             |     |     |             |     |     |
| A3990                          | Concrete Casting                         | 2                 | 11-05-2021 |             |     |     |             |     |     |             |     |     |             |     |     |             |     |     |             |     |     |             |     |     |             |     |     |             |     |     |
| A4010                          | Coating                                  | 1                 | 14-05-2021 |             |     |     |             |     |     |             |     |     |             |     |     |             |     |     |             |     |     |             |     |     |             |     |     |             |     |     |
| A4000                          | Deshuttering                             | 1                 | 13-05-2021 |             |     |     |             |     |     |             |     |     |             |     |     |             |     |     |             |     |     |             |     |     |             |     |     |             |     |     |
| <b>Misc Steel and Finishes</b> |                                          | 71                | 17-05-2021 |             |     |     |             |     |     |             |     |     |             |     |     |             |     |     |             |     |     |             |     |     |             |     |     |             |     |     |
| A3010                          | Erecting Main Steel Frames               | 25                | 20-05-2021 |             |     |     |             |     |     |             |     |     |             |     |     |             |     |     |             |     |     |             |     |     |             |     |     |             |     |     |
| A3680                          | Erecting Side Girts                      | 9                 | 21-07-2021 |             |     |     |             |     |     |             |     |     |             |     |     |             |     |     |             |     |     |             |     |     |             |     |     |             |     |     |
| A3190                          | Base Mat RFT Placement                   | 8                 | 06-07-2021 |             |     |     |             |     |     |             |     |     |             |     |     |             |     |     |             |     |     |             |     |     |             |     |     |             |     |     |
| A3180                          | Base Mat Shuttering                      | 8                 | 24-06-2021 |             |     |     |             |     |     |             |     |     |             |     |     |             |     |     |             |     |     |             |     |     |             |     |     |             |     |     |
| A3700                          | Painting the Structure against Corrosion | 5                 | 10-08-2021 |             |     |     |             |     |     |             |     |     |             |     |     |             |     |     |             |     |     |             |     |     |             |     |     |             |     |     |
| A3690                          | Erecting End Girts                       | 5                 | 03-08-2021 |             |     |     |             |     |     |             |     |     |             |     |     |             |     |     |             |     |     |             |     |     |             |     |     |             |     |     |
| A3710                          | Installing Claddings                     | 3                 | 17-08-2021 |             |     |     |             |     |     |             |     |     |             |     |     |             |     |     |             |     |     |             |     |     |             |     |     |             |     |     |
| A1520                          | Receiving Packages                       | 3                 | 17-05-2021 |             |     |     |             |     |     |             |     |     |             |     |     |             |     |     |             |     |     |             |     |     |             |     |     |             |     |     |
| A3720                          | Finishes                                 | 2                 | 20-08-2021 |             |     |     |             |     |     |             |     |     |             |     |     |             |     |     |             |     |     |             |     |     |             |     |     |             |     |     |
| A3220                          | Base Mat Finishes                        | 1                 | 20-07-2021 |             |     |     |             |     |     |             |     |     |             |     |     |             |     |     |             |     |     |             |     |     |             |     |     |             |     |     |
| A3210                          | Base Mat Deshuttering                    | 1                 | 19-07-2021 |             |     |     |             |     |     |             |     |     |             |     |     |             |     |     |             |     |     |             |     |     |             |     |     |             |     |     |
| A3200                          | Base Mat Concrete Casting                | 1                 | 16-07-2021 |             |     |     |             |     |     |             |     |     |             |     |     |             |     |     |             |     |     |             |     |     |             |     |     |             |     |     |
| <b>Mechanical Works</b>        |                                          | 263               | 20-08-2021 |             |     |     |             |     |     |             |     |     |             |     |     |             |     |     |             |     |     |             |     |     |             |     |     |             |     |     |
| <b>Boiler</b>                  |                                          | 77                | 20-08-2021 |             |     |     |             |     |     |             |     |     |             |     |     |             |     |     |             |     |     |             |     |     |             |     |     |             |     |     |
| A4050                          | Installing Main Boiler 3                 | 25                | 02-11-2021 |             |     |     |             |     |     |             |     |     |             |     |     |             |     |     |             |     |     |             |     |     |             |     |     |             |     |     |
| A4030                          | Installing Main Boiler 2                 | 25                | 28-09-2021 |             |     |     |             |     |     |             |     |     |             |     |     |             |     |     |             |     |     |             |     |     |             |     |     |             |     |     |
| A1820                          | Installing Main Boiler 1                 | 25                | 24-08-2021 |             |     |     |             |     |     |             |     |     |             |     |     |             |     |     |             |     |     |             |     |     |             |     |     |             |     |     |
| A4040                          | Receiving Boiler 3                       | 2                 | 26-08-2021 |             |     |     |             |     |     |             |     |     |             |     |     |             |     |     |             |     |     |             |     |     |             |     |     |             |     |     |
| A4020                          | Receiving Boiler 2                       | 2                 | 24-08-2021 |             |     |     |             |     |     |             |     |     |             |     |     |             |     |     |             |     |     |             |     |     |             |     |     |             |     |     |
| A1530                          | Receiving Boiler 1                       | 2                 | 20-08-2021 |             |     |     |             |     |     |             |     |     |             |     |     |             |     |     |             |     |     |             |     |     |             |     |     |             |     |     |
| <b>Auxiliary Systems</b>       |                                          | 169               | 30-12-2021 |             |     |     |             |     |     |             |     |     |             |     |     |             |     |     |             |     |     |             |     |     |             |     |     |             |     |     |
| A1570                          | Installing Coal Burners                  | 15                | 02-03-2022 |             |     |     |             |     |     |             |     |     |             |     |     |             |     |     |             |     |     |             |     |     |             |     |     |             |     |     |
| A1640                          | Installing Air Recovery Equip and Pre    | 12                | 21-06-2022 |             |     |     |             |     |     |             |     |     |             |     |     |             |     |     |             |     |     |             |     |     |             |     |     |             |     |     |
| A1630                          | Installing Draft Fans, Ducts, and Flues  | 12                | 03-06-2022 |             |     |     |             |     |     |             |     |     |             |     |     |             |     |     |             |     |     |             |     |     |             |     |     |             |     |     |
| A1600                          | Installing Pulverizers                   | 12                | 22-04-2022 |             |     |     |             |     |     |             |     |     |             |     |     |             |     |     |             |     |     |             |     |     |             |     |     |             |     |     |
| A1590                          | Installing Coal Burner Mgmt System       | 12                | 06-04-2022 |             |     |     |             |     |     |             |     |     |             |     |     |             |     |     |             |     |     |             |     |     |             |     |     |             |     |     |
| A1580                          | Installing Coal Burner Air Guide Regis   | 10                | 23-03-2022 |             |     |     |             |     |     |             |     |     |             |     |     |             |     |     |             |     |     |             |     |     |             |     |     |             |     |     |
| A3480                          | Installing Control Instruments           | 9                 | 09-08-2022 |             |     |     |             |     |     |             |     |     |             |     |     |             |     |     |             |     |     |             |     |     |             |     |     |             |     |     |
| A3270                          | Installing Piping and Valves             | 9                 | 27-07-2022 |             |     |     |             |     |     |             |     |     |             |     |     |             |     |     |             |     |     |             |     |     |             |     |     |             |     |     |
| A2560                          | Installing Flue Gas Cleanup System       | 9                 | 14-07-2022 |             |     |     |             |     |     |             |     |     |             |     |     |             |     |     |             |     |     |             |     |     |             |     |     |             |     |     |
| A1620                          | Installing Ash Hopper                    | 9                 | 23-05-2022 |             |     |     |             |     |     |             |     |     |             |     |     |             |     |     |             |     |     |             |     |     |             |     |     |             |     |     |
| A1610                          | Installing Stokers and Gates             | 9                 | 10-05-2022 |             |     |     |             |     |     |             |     |     |             |     |     |             |     |     |             |     |     |             |     |     |             |     |     |             |     |     |
| A1650                          | Installing Stacks                        | 5                 | 07-07-2022 |             |     |     |             |     |     |             |     |     |             |     |     |             |     |     |             |     |     |             |     |     |             |     |     |             |     |     |
| A4060                          | Mechanical Finishes                      | 2                 | 22-08-2022 |             |     |     |             |     |     |             |     |     |             |     |     |             |     |     |             |     |     |             |     |     |             |     |     |             |     |     |
| A1560                          | Receiving Package 3                      | 1                 | 01-03-2022 |             |     |     |             |     |     |             |     |     |             |     |     |             |     |     |             |     |     |             |     |     |             |     |     |             |     |     |
| A1550                          | Receiving Package 2                      | 1                 | 28-01-2022 |             |     |     |             |     |     |             |     |     |             |     |     |             |     |     |             |     |     |             |     |     |             |     |     |             |     |     |
| A1540                          | Receiving Package 1                      | 1                 | 30-12-2021 |             |     |     |             |     |     |             |     |     |             |     |     |             |     |     |             |     |     |             |     |     |             |     |     |             |     |     |
| <b>Electrical Works</b>        |                                          | 2                 | 24-08-2022 |             |     |     |             |     |     |             |     |     |             |     |     |             |     |     |             |     |     |             |     |     |             |     |     |             |     |     |
| A3240                          | Electrical Finishes                      | 1                 | 25-08-2022 |             |     |     |             |     |     |             |     |     |             |     |     |             |     |     |             |     |     |             |     |     |             |     |     |             |     |     |
| A3230                          | Installing Telephone Lines               | 1                 | 24-08-2022 |             |     |     |             |     |     |             |     |     |             |     |     |             |     |     |             |     |     |             |     |     |             |     |     |             |     |     |
| <b>Steam Engine Turbine</b>    |                                          | 388               | 03-03-2021 |             |     |     |             |     |     |             |     |     |             |     |     |             |     |     |             |     |     |             |     |     |             |     |     |             |     |     |
| <b>Civil Works</b>             |                                          | 190               | 03-03-2021 |             |     |     |             |     |     |             |     |     |             |     |     |             |     |     |             |     |     |             |     |     |             |     |     |             |     |     |
| <b>Earthworks</b>              |                                          | 100               | 03-03-2021 |             |     |     |             |     |     |             |     |     |             |     |     |             |     |     |             |     |     |             |     |     |             |     |     |             |     |     |
| A1660                          | Excavation                               | 5                 | 03-03-2021 |             |     |     |             |     |     |             |     |     |             |     |     |             |     |     |             |     |     |             |     |     |             |     |     |             |     |     |
| A1680                          | Compaction                               | 4                 | 15-07-2021 |             |     |     |             |     |     |             |     |     |             |     |     |             |     |     |             |     |     |             |     |     |             |     |     |             |     |     |
| A1670                          | Filing                                   | 3                 | 12-07-2021 |             |     |     |             |     |     |             |     |     |             |     |     |             |     |     |             |     |     |             |     |     |             |     |     |             |     |     |
| <b>Foundations</b>             |                                          | 47                | 06-05-2021 |             |     |     |             |     |     |             |     |     |             |     |     |             |     |     |             |     |     |             |     |     |             |     |     |             |     |     |
| <b>RC Foundations</b>          |                                          | 34                | 24-05-2021 |             |     |     |             |     |     |             |     |     |             |     |     |             |     |     |             |     |     |             |     |     |             |     |     |             |     |     |
| A1750                          | RFT Placement                            | 9                 | 04-06-2021 |             |     |     |             |     |     |             |     |     |             |     |     |             |     |     |             |     |     |             |     |     |             |     |     |             |     |     |
| A1740                          | Shuttering                               | 9                 | 24-05-2021 |             |     |     |             |     |     |             |     |     |             |     |     |             |     |     |             |     |     |             |     |     |             |     |     |             |     |     |
| A1780                          | Coating                                  | 2                 | 07-07-2021 |             |     |     |             |     |     |             |     |     |             |     |     |             |     |     |             |     |     |             |     |     |             |     |     |             |     |     |
| A1760                          | Concrete Casting                         | 2                 | 17-06-2021 |             |     |     |             |     |     |             |     |     |             |     |     |             |     |     |             |     |     |             |     |     |             |     |     |             |     |     |
| A1770                          | Deshuttering                             | 1                 | 21-06-2021 |             |     |     |             |     |     |             |     |     |             |     |     |             |     |     |             |     |     |             |     |     |             |     |     |             |     |     |
| <b>PC Foundations</b>          |                                          | 44                | 06-05-2021 |             |     |     |             |     |     |             |     |     |             |     |     |             |     |     |             |     |     |             |     |     |             |     |     |             |     |     |



| Activity ID                 | Activity Name                                  | Original Duration | Start             | Qtr 1, 2021 |     |     | Qtr 2, 2021 |     |     | Qtr 3, 2021 |     |     | Qtr 4, 2021 |     |     | Qtr 1, 2022 |     |     | Qtr 2, 2022 |     |     | Qtr 3, 2022 |     |     | Qtr 4, 2022 |     |     | Qtr 1, 2023 |     |     |
|-----------------------------|------------------------------------------------|-------------------|-------------------|-------------|-----|-----|-------------|-----|-----|-------------|-----|-----|-------------|-----|-----|-------------|-----|-----|-------------|-----|-----|-------------|-----|-----|-------------|-----|-----|-------------|-----|-----|
|                             |                                                |                   |                   | Jan         | Feb | Mar | Apr         | May | Jun | Jul         | Aug | Sep | Oct         | Nov | Dec | Jan         | Feb | Mar | Apr         | May | Jun | Jul         | Aug | Sep | Oct         | Nov | Dec | Jan         | Feb | Mar |
| A3340                       | Installing Closed Type Feedwater Heater        | 10                | 30-09-2021        |             |     |     |             |     |     |             |     |     |             |     |     |             |     |     |             |     |     |             |     |     |             |     |     |             |     |     |
| A4280                       | Receiving Feeder 3                             | 2                 | 04-11-2021        |             |     |     |             |     |     |             |     |     |             |     |     |             |     |     |             |     |     |             |     |     |             |     |     |             |     |     |
| A4260                       | Receiving Feeder 2                             | 2                 | 02-11-2021        |             |     |     |             |     |     |             |     |     |             |     |     |             |     |     |             |     |     |             |     |     |             |     |     |             |     |     |
| A1990                       | Receiving Feeder 1                             | 2                 | 28-09-2021        |             |     |     |             |     |     |             |     |     |             |     |     |             |     |     |             |     |     |             |     |     |             |     |     |             |     |     |
| <b>Auxiliary Systems</b>    |                                                | <b>137</b>        | <b>14-10-2021</b> |             |     |     |             |     |     |             |     |     |             |     |     |             |     |     |             |     |     |             |     |     |             |     |     |             |     |     |
| A2050                       | Installing Thermocouple and Test Well          | 18                | 07-01-2022        |             |     |     |             |     |     |             |     |     |             |     |     |             |     |     |             |     |     |             |     |     |             |     |     |             |     |     |
| A2030                       | Installing Shell and Tube Relief Valve         | 18                | 17-12-2021*       |             |     |     |             |     |     |             |     |     |             |     |     |             |     |     |             |     |     |             |     |     |             |     |     |             |     |     |
| A3620                       | Installing Control System                      | 17                | 28-03-2022        |             |     |     |             |     |     |             |     |     |             |     |     |             |     |     |             |     |     |             |     |     |             |     |     |             |     |     |
| A2040                       | Installing Thermometer                         | 15                | 17-12-2021*       |             |     |     |             |     |     |             |     |     |             |     |     |             |     |     |             |     |     |             |     |     |             |     |     |             |     |     |
| A3360                       | Installing Boiler Feed Suction Discharge Pipes | 8                 | 16-03-2022        |             |     |     |             |     |     |             |     |     |             |     |     |             |     |     |             |     |     |             |     |     |             |     |     |             |     |     |
| A3350                       | Installing Boiler Feedwater Pumps              | 8                 | 04-03-2022        |             |     |     |             |     |     |             |     |     |             |     |     |             |     |     |             |     |     |             |     |     |             |     |     |             |     |     |
| A2070                       | Installing Drain Outlet                        | 8                 | 14-02-2022        |             |     |     |             |     |     |             |     |     |             |     |     |             |     |     |             |     |     |             |     |     |             |     |     |             |     |     |
| A2060                       | Installing Steam Inlet                         | 8                 | 02-02-2022        |             |     |     |             |     |     |             |     |     |             |     |     |             |     |     |             |     |     |             |     |     |             |     |     |             |     |     |
| A2080                       | Installing Pressure Gauges                     | 6                 | 24-02-2022        |             |     |     |             |     |     |             |     |     |             |     |     |             |     |     |             |     |     |             |     |     |             |     |     |             |     |     |
| A4300                       | Mechanical Finishes                            | 2                 | 20-04-2022        |             |     |     |             |     |     |             |     |     |             |     |     |             |     |     |             |     |     |             |     |     |             |     |     |             |     |     |
| A4310                       | Electrical Finishes                            | 1                 | 22-04-2022        |             |     |     |             |     |     |             |     |     |             |     |     |             |     |     |             |     |     |             |     |     |             |     |     |             |     |     |
| A2020                       | Receiving Package 3                            | 1                 | 15-12-2021*       |             |     |     |             |     |     |             |     |     |             |     |     |             |     |     |             |     |     |             |     |     |             |     |     |             |     |     |
| A2010                       | Receiving Package 2                            | 1                 | 18-11-2021        |             |     |     |             |     |     |             |     |     |             |     |     |             |     |     |             |     |     |             |     |     |             |     |     |             |     |     |
| A2000                       | Receiving Package 1                            | 1                 | 14-10-2021        |             |     |     |             |     |     |             |     |     |             |     |     |             |     |     |             |     |     |             |     |     |             |     |     |             |     |     |
| <b>Service Water System</b> |                                                | <b>45</b>         | <b>25-08-2022</b> |             |     |     |             |     |     |             |     |     |             |     |     |             |     |     |             |     |     |             |     |     |             |     |     |             |     |     |
| <b>Main System</b>          |                                                | <b>24</b>         | <b>25-08-2022</b> |             |     |     |             |     |     |             |     |     |             |     |     |             |     |     |             |     |     |             |     |     |             |     |     |             |     |     |
| A4360                       | Installing Circulating Water Pumps 3           | 10                | 14-09-2022        |             |     |     |             |     |     |             |     |     |             |     |     |             |     |     |             |     |     |             |     |     |             |     |     |             |     |     |
| A4330                       | Installing Circulating Water Pumps 2           | 10                | 05-09-2022        |             |     |     |             |     |     |             |     |     |             |     |     |             |     |     |             |     |     |             |     |     |             |     |     |             |     |     |
| A2100                       | Installing Circulating Water Pumps 1           | 10                | 29-08-2022        |             |     |     |             |     |     |             |     |     |             |     |     |             |     |     |             |     |     |             |     |     |             |     |     |             |     |     |
| A4370                       | Installing Temperature Controls 3              | 5                 | 14-09-2022        |             |     |     |             |     |     |             |     |     |             |     |     |             |     |     |             |     |     |             |     |     |             |     |     |             |     |     |
| A4340                       | Installing Temperature Controls 2              | 5                 | 05-09-2022        |             |     |     |             |     |     |             |     |     |             |     |     |             |     |     |             |     |     |             |     |     |             |     |     |             |     |     |
| A3410                       | Installing Temperature Controls 1              | 5                 | 29-08-2022        |             |     |     |             |     |     |             |     |     |             |     |     |             |     |     |             |     |     |             |     |     |             |     |     |             |     |     |
| A4350                       | Receiving Package 3                            | 2                 | 12-09-2022        |             |     |     |             |     |     |             |     |     |             |     |     |             |     |     |             |     |     |             |     |     |             |     |     |             |     |     |
| A4320                       | Receiving Package 2                            | 2                 | 29-08-2022        |             |     |     |             |     |     |             |     |     |             |     |     |             |     |     |             |     |     |             |     |     |             |     |     |             |     |     |
| A2090                       | Receiving Package 1                            | 2                 | 25-08-2022        |             |     |     |             |     |     |             |     |     |             |     |     |             |     |     |             |     |     |             |     |     |             |     |     |             |     |     |
| <b>Auxiliary Systems</b>    |                                                | <b>38</b>         | <b>05-09-2022</b> |             |     |     |             |     |     |             |     |     |             |     |     |             |     |     |             |     |     |             |     |     |             |     |     |             |     |     |
| A3420                       | Installing Pipes                               | 12                | 22-09-2022        |             |     |     |             |     |     |             |     |     |             |     |     |             |     |     |             |     |     |             |     |     |             |     |     |             |     |     |
| A3630                       | Installing Switches and Instrumentation        | 10                | 10-10-2022        |             |     |     |             |     |     |             |     |     |             |     |     |             |     |     |             |     |     |             |     |     |             |     |     |             |     |     |
| A4380                       | Mechanical Finishes                            | 2                 | 24-10-2022        |             |     |     |             |     |     |             |     |     |             |     |     |             |     |     |             |     |     |             |     |     |             |     |     |             |     |     |
| A4390                       | Electrical Finishes                            | 1                 | 26-10-2022        |             |     |     |             |     |     |             |     |     |             |     |     |             |     |     |             |     |     |             |     |     |             |     |     |             |     |     |
| A3370                       | Receiving of Package 3                         | 1                 | 21-09-2022        |             |     |     |             |     |     |             |     |     |             |     |     |             |     |     |             |     |     |             |     |     |             |     |     |             |     |     |
| A2120                       | Receiving of Package 2                         | 1                 | 06-09-2022        |             |     |     |             |     |     |             |     |     |             |     |     |             |     |     |             |     |     |             |     |     |             |     |     |             |     |     |
| A2110                       | Receiving of Package 1                         | 1                 | 05-09-2022        |             |     |     |             |     |     |             |     |     |             |     |     |             |     |     |             |     |     |             |     |     |             |     |     |             |     |     |
| <b>Cooling System</b>       |                                                | <b>446</b>        | <b>10-03-2021</b> |             |     |     |             |     |     |             |     |     |             |     |     |             |     |     |             |     |     |             |     |     |             |     |     |             |     |     |
| <b>Civil Works</b>          |                                                | <b>146</b>        | <b>10-03-2021</b> |             |     |     |             |     |     |             |     |     |             |     |     |             |     |     |             |     |     |             |     |     |             |     |     |             |     |     |
| <b>Earthworks</b>           |                                                | <b>107</b>        | <b>10-03-2021</b> |             |     |     |             |     |     |             |     |     |             |     |     |             |     |     |             |     |     |             |     |     |             |     |     |             |     |     |
| A2250                       | Excavation                                     | 5                 | 10-03-2021        |             |     |     |             |     |     |             |     |     |             |     |     |             |     |     |             |     |     |             |     |     |             |     |     |             |     |     |
| A2270                       | Compaction                                     | 4                 | 02-08-2021        |             |     |     |             |     |     |             |     |     |             |     |     |             |     |     |             |     |     |             |     |     |             |     |     |             |     |     |
| A2260                       | Filling                                        | 3                 | 28-07-2021        |             |     |     |             |     |     |             |     |     |             |     |     |             |     |     |             |     |     |             |     |     |             |     |     |             |     |     |
| <b>Foundations</b>          |                                                | <b>95</b>         | <b>17-03-2021</b> |             |     |     |             |     |     |             |     |     |             |     |     |             |     |     |             |     |     |             |     |     |             |     |     |             |     |     |
| A2310                       | RFT Placement                                  | 14                | 30-06-2021        |             |     |     |             |     |     |             |     |     |             |     |     |             |     |     |             |     |     |             |     |     |             |     |     |             |     |     |
| A2300                       | Shuttering                                     | 8                 | 25-03-2021        |             |     |     |             |     |     |             |     |     |             |     |     |             |     |     |             |     |     |             |     |     |             |     |     |             |     |     |
| A2290                       | Installing Piles                               | 6                 | 17-03-2021        |             |     |     |             |     |     |             |     |     |             |     |     |             |     |     |             |     |     |             |     |     |             |     |     |             |     |     |
| A2500                       | Coating                                        | 3                 | 23-07-2021        |             |     |     |             |     |     |             |     |     |             |     |     |             |     |     |             |     |     |             |     |     |             |     |     |             |     |     |
| A2320                       | Concrete Casting                               | 2                 | 20-07-2021        |             |     |     |             |     |     |             |     |     |             |     |     |             |     |     |             |     |     |             |     |     |             |     |     |             |     |     |
| A2330                       | Deshuttering                                   | 1                 | 22-07-2021        |             |     |     |             |     |     |             |     |     |             |     |     |             |     |     |             |     |     |             |     |     |             |     |     |             |     |     |
| <b>Water Cooling Towers</b> |                                                | <b>39</b>         | <b>06-08-2021</b> |             |     |     |             |     |     |             |     |     |             |     |     |             |     |     |             |     |     |             |     |     |             |     |     |             |     |     |
| <b>Tower 1</b>              |                                                | <b>39</b>         | <b>06-08-2021</b> |             |     |     |             |     |     |             |     |     |             |     |     |             |     |     |             |     |     |             |     |     |             |     |     |             |     |     |
| A2350                       | RFT Placement                                  | 15                | 27-08-2021        |             |     |     |             |     |     |             |     |     |             |     |     |             |     |     |             |     |     |             |     |     |             |     |     |             |     |     |
| A2340                       | Shuttering                                     | 15                | 06-08-2021        |             |     |     |             |     |     |             |     |     |             |     |     |             |     |     |             |     |     |             |     |     |             |     |     |             |     |     |
| A2380                       | Finishes                                       | 3                 | 27-09-2021        |             |     |     |             |     |     |             |     |     |             |     |     |             |     |     |             |     |     |             |     |     |             |     |     |             |     |     |
| A2370                       | Deshuttering                                   | 3                 | 22-09-2021        |             |     |     |             |     |     |             |     |     |             |     |     |             |     |     |             |     |     |             |     |     |             |     |     |             |     |     |
| A2360                       | Concrete Casting                               | 3                 | 17-09-2021        |             |     |     |             |     |     |             |     |     |             |     |     |             |     |     |             |     |     |             |     |     |             |     |     |             |     |     |
| <b>Tower 2</b>              |                                                | <b>39</b>         | <b>06-08-2021</b> |             |     |     |             |     |     |             |     |     |             |     |     |             |     |     |             |     |     |             |     |     |             |     |     |             |     |     |
| A4410                       | RFT Placement                                  | 15                | 27-08-2021        |             |     |     |             |     |     |             |     |     |             |     |     |             |     |     |             |     |     |             |     |     |             |     |     |             |     |     |
| A4400                       | Shuttering                                     | 15                | 06-08-2021        |             |     |     |             |     |     |             |     |     |             |     |     |             |     |     |             |     |     |             |     |     |             |     |     |             |     |     |
| A4440                       | Finishes                                       | 3                 | 27-09-2021        |             |     |     |             |     |     |             |     |     |             |     |     |             |     |     |             |     |     |             |     |     |             |     |     |             |     |     |
| A4430                       | Deshuttering                                   | 3                 | 22-09-2021        |             |     |     |             |     |     |             |     |     |             |     |     |             |     |     |             |     |     |             |     |     |             |     |     |             |     |     |
| A4420                       | Concrete Casting                               | 3                 | 17-09-2021        |             |     |     |             |     |     |             |     |     |             |     |     |             |     |     |             |     |     |             |     |     |             |     |     |             |     |     |
| <b>Tower 3</b>              |                                                | <b>39</b>         | <b>06-08-2021</b> |             |     |     |             |     |     |             |     |     |             |     |     |             |     |     |             |     |     |             |     |     |             |     |     |             |     |     |
| A4460                       | RFT Placement                                  | 15                | 27-08-2021        |             |     |     |             |     |     |             |     |     |             |     |     |             |     |     |             |     |     |             |     |     |             |     |     |             |     |     |
| A4450                       | Shuttering                                     | 15                | 06-08-2021        |             |     |     |             |     |     |             |     |     |             |     |     |             |     |     |             |     |     |             |     |     |             |     |     |             |     |     |
| A4490                       | Finishes                                       | 3                 | 27-09-2021        |             |     |     |             |     |     |             |     |     |             |     |     |             |     |     |             |     |     |             |     |     |             |     |     |             |     |     |
| A4480                       | Deshuttering                                   | 3                 | 22-09-2021        |             |     |     |             |     |     |             |     |     |             |     |     |             |     |     |             |     |     |             |     |     |             |     |     |             |     |     |
| A4470                       | Concrete Casting                               | 3                 | 17-09-2021        |             |     |     |             |     |     |             |     |     |             |     |     |             |     |     |             |     |     |             |     |     |             |     |     |             |     |     |
| <b>Mechanical Works</b>     |                                                | <b>45</b>         | <b>22-09-2022</b> |             |     |     |             |     |     |             |     |     |             |     |     |             |     |     |             |     |     |             |     |     |             |     |     |             |     |     |
| <b>Main System</b>          |                                                | <b>22</b>         | <b>22-09-2022</b> |             |     |     |             |     |     |             |     |     |             |     |     |             |     |     |             |     |     |             |     |     |             |     |     |             |     |     |
| A3380                       | Installing Cooling Water Pumps                 | 8                 | 27-09-2022        |             |     |     |             |     |     |             |     |     |             |     |     |             |     |     |             |     |     |             |     |     |             |     |     |             |     |     |
| A4500                       | Installing Heat Exchangers                     | 6                 | 07-10-2022        |             |     |     |             |     |     |             |     |     |             |     |     |             |     |     |             |     |     |             |     |     |             |     |     |             |     |     |
| A4510                       | Installing Temperature Controls                | 5                 | 17-10-2022        |             |     |     |             |     |     |             |     |     |             |     |     |             |     |     |             |     |     |             |     |     |             |     |     |             |     |     |
| A2150                       | Receiving Package 3                            | 1                 | 26-09-2022        |             |     |     |             |     |     |             |     |     |             |     |     |             |     |     |             |     |     |             |     |     |             |     |     |             |     |     |

Actual Work
  Critical Remaining Work
  Remaining Work





| Activity ID                                       | Activity Name                              | Original Duration | Start             | Qtr 1, 2021 |     |     | Qtr 2, 2021 |     |     | Qtr 3, 2021 |     |     | Qtr 4, 2021 |     |     | Qtr 1, 2022 |     |     | Qtr 2, 2022 |     |     | Qtr 3, 2022 |     |     | Qtr 4, 2022 |     |     | Qtr 1, 2023 |     |     |
|---------------------------------------------------|--------------------------------------------|-------------------|-------------------|-------------|-----|-----|-------------|-----|-----|-------------|-----|-----|-------------|-----|-----|-------------|-----|-----|-------------|-----|-----|-------------|-----|-----|-------------|-----|-----|-------------|-----|-----|
|                                                   |                                            |                   |                   | Jan         | Feb | Mar | Apr         | May | Jun | Jul         | Aug | Sep | Oct         | Nov | Dec | Jan         | Feb | Mar | Apr         | May | Jun | Jul         | Aug | Sep | Oct         | Nov | Dec | Jan         | Feb | Mar |
| A2850                                             | Installing Generator 1                     | 14                | 12-08-2021        |             |     |     |             |     |     |             |     |     |             |     |     |             |     |     |             |     |     |             |     |     |             |     |     |             |     |     |
| A4700                                             | Receiving Generator 3                      | 2                 | 16-08-2021        |             |     |     |             |     |     |             |     |     |             |     |     |             |     |     |             |     |     |             |     |     |             |     |     |             |     |     |
| A4680                                             | Receiving Generator 2                      | 2                 | 12-08-2021        |             |     |     |             |     |     |             |     |     |             |     |     |             |     |     |             |     |     |             |     |     |             |     |     |             |     |     |
| A2720                                             | Receiving Generator 1                      | 2                 | 10-08-2021        |             |     |     |             |     |     |             |     |     |             |     |     |             |     |     |             |     |     |             |     |     |             |     |     |             |     |     |
| <b>Switchers</b>                                  |                                            | <b>50</b>         | <b>11-10-2021</b> |             |     |     |             |     |     |             |     |     |             |     |     |             |     |     |             |     |     |             |     |     |             |     |     |             |     |     |
| A4750                                             | Installing Switchers 3                     | 16                | 26-11-2021        |             |     |     |             |     |     |             |     |     |             |     |     |             |     |     |             |     |     |             |     |     |             |     |     |             |     |     |
| A4730                                             | Installing Switchers 2                     | 16                | 04-11-2021        |             |     |     |             |     |     |             |     |     |             |     |     |             |     |     |             |     |     |             |     |     |             |     |     |             |     |     |
| A3500                                             | Installing Switchers 1                     | 16                | 13-10-2021        |             |     |     |             |     |     |             |     |     |             |     |     |             |     |     |             |     |     |             |     |     |             |     |     |             |     |     |
| A4740                                             | Receiving Switchers 3                      | 2                 | 15-10-2021        |             |     |     |             |     |     |             |     |     |             |     |     |             |     |     |             |     |     |             |     |     |             |     |     |             |     |     |
| A4720                                             | Receiving Switchers 2                      | 2                 | 13-10-2021        |             |     |     |             |     |     |             |     |     |             |     |     |             |     |     |             |     |     |             |     |     |             |     |     |             |     |     |
| A2730                                             | Receiving Switchers 1                      | 2                 | 11-10-2021        |             |     |     |             |     |     |             |     |     |             |     |     |             |     |     |             |     |     |             |     |     |             |     |     |             |     |     |
| <b>Transformers</b>                               |                                            | <b>29</b>         | <b>27-12-2021</b> |             |     |     |             |     |     |             |     |     |             |     |     |             |     |     |             |     |     |             |     |     |             |     |     |             |     |     |
| A4790                                             | Installing Transformers 3                  | 9                 | 24-01-2022        |             |     |     |             |     |     |             |     |     |             |     |     |             |     |     |             |     |     |             |     |     |             |     |     |             |     |     |
| A4770                                             | Installing Transformers 2                  | 9                 | 11-01-2022        |             |     |     |             |     |     |             |     |     |             |     |     |             |     |     |             |     |     |             |     |     |             |     |     |             |     |     |
| A3510                                             | Installing Transformers 1                  | 9                 | 29-12-2021*       |             |     |     |             |     |     |             |     |     |             |     |     |             |     |     |             |     |     |             |     |     |             |     |     |             |     |     |
| A4780                                             | Receiving Transformers 3                   | 2                 | 27-12-2021*       |             |     |     |             |     |     |             |     |     |             |     |     |             |     |     |             |     |     |             |     |     |             |     |     |             |     |     |
| A4760                                             | Receiving Transformers 2                   | 2                 | 27-12-2021*       |             |     |     |             |     |     |             |     |     |             |     |     |             |     |     |             |     |     |             |     |     |             |     |     |             |     |     |
| A2740                                             | Receiving Transformers 1                   | 2                 | 27-12-2021*       |             |     |     |             |     |     |             |     |     |             |     |     |             |     |     |             |     |     |             |     |     |             |     |     |             |     |     |
| <b>Auxiliary Systems</b>                          |                                            | <b>47</b>         | <b>04-02-2022</b> |             |     |     |             |     |     |             |     |     |             |     |     |             |     |     |             |     |     |             |     |     |             |     |     |             |     |     |
| A3590                                             | Installing Auxiliary Transformers          | 15                | 07-03-2022        |             |     |     |             |     |     |             |     |     |             |     |     |             |     |     |             |     |     |             |     |     |             |     |     |             |     |     |
| A4820                                             | Electrical Finishes                        | 3                 | 07-04-2022        |             |     |     |             |     |     |             |     |     |             |     |     |             |     |     |             |     |     |             |     |     |             |     |     |             |     |     |
| A4810                                             | Mechanical Finishes                        | 3                 | 04-04-2022        |             |     |     |             |     |     |             |     |     |             |     |     |             |     |     |             |     |     |             |     |     |             |     |     |             |     |     |
| A3650                                             | Installing Electrical Cables               | 3                 | 28-03-2022        |             |     |     |             |     |     |             |     |     |             |     |     |             |     |     |             |     |     |             |     |     |             |     |     |             |     |     |
| A3520                                             | Intalling Transformer Alarms               | 3                 | 02-03-2022        |             |     |     |             |     |     |             |     |     |             |     |     |             |     |     |             |     |     |             |     |     |             |     |     |             |     |     |
| A2800                                             | Installing Oil Circuit Tank and Breaker    | 3                 | 25-02-2022        |             |     |     |             |     |     |             |     |     |             |     |     |             |     |     |             |     |     |             |     |     |             |     |     |             |     |     |
| A2790                                             | Installing Structures and Buses            | 3                 | 22-02-2022        |             |     |     |             |     |     |             |     |     |             |     |     |             |     |     |             |     |     |             |     |     |             |     |     |             |     |     |
| A2780                                             | Installing Station Service Switchgear      | 3                 | 17-02-2022        |             |     |     |             |     |     |             |     |     |             |     |     |             |     |     |             |     |     |             |     |     |             |     |     |             |     |     |
| A2770                                             | Receiving Package 3                        | 3                 | 14-02-2022        |             |     |     |             |     |     |             |     |     |             |     |     |             |     |     |             |     |     |             |     |     |             |     |     |             |     |     |
| A2760                                             | Receiving Package 2                        | 3                 | 09-02-2022        |             |     |     |             |     |     |             |     |     |             |     |     |             |     |     |             |     |     |             |     |     |             |     |     |             |     |     |
| A2750                                             | Receiving Package 1                        | 3                 | 04-02-2022        |             |     |     |             |     |     |             |     |     |             |     |     |             |     |     |             |     |     |             |     |     |             |     |     |             |     |     |
| A4800                                             | Installing Telephone Lines                 | 2                 | 31-03-2022        |             |     |     |             |     |     |             |     |     |             |     |     |             |     |     |             |     |     |             |     |     |             |     |     |             |     |     |
| <b>Control Buildings</b>                          |                                            | <b>209</b>        | <b>22-02-2021</b> |             |     |     |             |     |     |             |     |     |             |     |     |             |     |     |             |     |     |             |     |     |             |     |     |             |     |     |
| <b>Civil Works</b>                                |                                            | <b>145</b>        | <b>22-02-2021</b> |             |     |     |             |     |     |             |     |     |             |     |     |             |     |     |             |     |     |             |     |     |             |     |     |             |     |     |
| <b>Earthworks</b>                                 |                                            | <b>70</b>         | <b>22-02-2021</b> |             |     |     |             |     |     |             |     |     |             |     |     |             |     |     |             |     |     |             |     |     |             |     |     |             |     |     |
| A2810                                             | Excavation                                 | 5                 | 22-02-2021        |             |     |     |             |     |     |             |     |     |             |     |     |             |     |     |             |     |     |             |     |     |             |     |     |             |     |     |
| A2830                                             | Compaction                                 | 4                 | 25-05-2021        |             |     |     |             |     |     |             |     |     |             |     |     |             |     |     |             |     |     |             |     |     |             |     |     |             |     |     |
| A2820                                             | Filling                                    | 3                 | 20-05-2021        |             |     |     |             |     |     |             |     |     |             |     |     |             |     |     |             |     |     |             |     |     |             |     |     |             |     |     |
| <b>Foundations</b>                                |                                            | <b>27</b>         | <b>13-04-2021</b> |             |     |     |             |     |     |             |     |     |             |     |     |             |     |     |             |     |     |             |     |     |             |     |     |             |     |     |
| <b>PC Footing</b>                                 |                                            | <b>25</b>         | <b>13-04-2021</b> |             |     |     |             |     |     |             |     |     |             |     |     |             |     |     |             |     |     |             |     |     |             |     |     |             |     |     |
| A2840                                             | Shuttering                                 | 6                 | 13-04-2021        |             |     |     |             |     |     |             |     |     |             |     |     |             |     |     |             |     |     |             |     |     |             |     |     |             |     |     |
| A2880                                             | Coating                                    | 2                 | 14-05-2021        |             |     |     |             |     |     |             |     |     |             |     |     |             |     |     |             |     |     |             |     |     |             |     |     |             |     |     |
| A2860                                             | Concrete Casting                           | 2                 | 21-04-2021        |             |     |     |             |     |     |             |     |     |             |     |     |             |     |     |             |     |     |             |     |     |             |     |     |             |     |     |
| A2870                                             | Deshuttering                               | 1                 | 23-04-2021        |             |     |     |             |     |     |             |     |     |             |     |     |             |     |     |             |     |     |             |     |     |             |     |     |             |     |     |
| <b>RC Footing</b>                                 |                                            | <b>18</b>         | <b>26-04-2021</b> |             |     |     |             |     |     |             |     |     |             |     |     |             |     |     |             |     |     |             |     |     |             |     |     |             |     |     |
| A2900                                             | RFT Placement                              | 6                 | 04-05-2021        |             |     |     |             |     |     |             |     |     |             |     |     |             |     |     |             |     |     |             |     |     |             |     |     |             |     |     |
| A2890                                             | Shuttering                                 | 6                 | 26-04-2021        |             |     |     |             |     |     |             |     |     |             |     |     |             |     |     |             |     |     |             |     |     |             |     |     |             |     |     |
| A2930                                             | Coating                                    | 2                 | 18-05-2021        |             |     |     |             |     |     |             |     |     |             |     |     |             |     |     |             |     |     |             |     |     |             |     |     |             |     |     |
| A2920                                             | Deshuttering                               | 1                 | 13-05-2021        |             |     |     |             |     |     |             |     |     |             |     |     |             |     |     |             |     |     |             |     |     |             |     |     |             |     |     |
| A2910                                             | Concrete Casting                           | 1                 | 12-05-2021        |             |     |     |             |     |     |             |     |     |             |     |     |             |     |     |             |     |     |             |     |     |             |     |     |             |     |     |
| <b>Superstructure</b>                             |                                            | <b>54</b>         | <b>26-05-2021</b> |             |     |     |             |     |     |             |     |     |             |     |     |             |     |     |             |     |     |             |     |     |             |     |     |             |     |     |
| A2950                                             | Erecting Main Steel Frames                 | 25                | 09-06-2021        |             |     |     |             |     |     |             |     |     |             |     |     |             |     |     |             |     |     |             |     |     |             |     |     |             |     |     |
| A3930                                             | Base Mat RFT Placement                     | 8                 | 26-07-2021        |             |     |     |             |     |     |             |     |     |             |     |     |             |     |     |             |     |     |             |     |     |             |     |     |             |     |     |
| A3920                                             | Base Mat Shuttering                        | 8                 | 14-07-2021        |             |     |     |             |     |     |             |     |     |             |     |     |             |     |     |             |     |     |             |     |     |             |     |     |             |     |     |
| A2940                                             | Receiving Packages                         | 3                 | 26-05-2021        |             |     |     |             |     |     |             |     |     |             |     |     |             |     |     |             |     |     |             |     |     |             |     |     |             |     |     |
| A3960                                             | Base Mat Finishes                          | 1                 | 09-08-2021        |             |     |     |             |     |     |             |     |     |             |     |     |             |     |     |             |     |     |             |     |     |             |     |     |             |     |     |
| A3950                                             | Base Mat Deshuttering                      | 1                 | 06-08-2021        |             |     |     |             |     |     |             |     |     |             |     |     |             |     |     |             |     |     |             |     |     |             |     |     |             |     |     |
| A3940                                             | Base Mat Concrete Casting                  | 1                 | 05-08-2021        |             |     |     |             |     |     |             |     |     |             |     |     |             |     |     |             |     |     |             |     |     |             |     |     |             |     |     |
| <b>Finishes</b>                                   |                                            | <b>26</b>         | <b>06-08-2021</b> |             |     |     |             |     |     |             |     |     |             |     |     |             |     |     |             |     |     |             |     |     |             |     |     |             |     |     |
| A3040                                             | Painting the Structure against Corrosion   | 9                 | 10-08-2021        |             |     |     |             |     |     |             |     |     |             |     |     |             |     |     |             |     |     |             |     |     |             |     |     |             |     |     |
| A3060                                             | Erecting End Girts                         | 5                 | 30-08-2021        |             |     |     |             |     |     |             |     |     |             |     |     |             |     |     |             |     |     |             |     |     |             |     |     |             |     |     |
| A3050                                             | Erecting Side Girts                        | 5                 | 23-08-2021        |             |     |     |             |     |     |             |     |     |             |     |     |             |     |     |             |     |     |             |     |     |             |     |     |             |     |     |
| A3070                                             | Installing Claddings                       | 3                 | 06-09-2021        |             |     |     |             |     |     |             |     |     |             |     |     |             |     |     |             |     |     |             |     |     |             |     |     |             |     |     |
| A3540                                             | Finishes                                   | 2                 | 09-09-2021        |             |     |     |             |     |     |             |     |     |             |     |     |             |     |     |             |     |     |             |     |     |             |     |     |             |     |     |
| A3030                                             | Receiving Packages                         | 2                 | 06-08-2021        |             |     |     |             |     |     |             |     |     |             |     |     |             |     |     |             |     |     |             |     |     |             |     |     |             |     |     |
| <b>Electrical Works</b>                           |                                            | <b>25</b>         | <b>09-09-2021</b> |             |     |     |             |     |     |             |     |     |             |     |     |             |     |     |             |     |     |             |     |     |             |     |     |             |     |     |
| <b>Instruments and Control Systems</b>            |                                            | <b>25</b>         | <b>09-09-2021</b> |             |     |     |             |     |     |             |     |     |             |     |     |             |     |     |             |     |     |             |     |     |             |     |     |             |     |     |
| A2960                                             | Installing Control System                  | 20                | 09-09-2021        |             |     |     |             |     |     |             |     |     |             |     |     |             |     |     |             |     |     |             |     |     |             |     |     |             |     |     |
| A3550                                             | Installing Telephone Comm System           | 3                 | 07-10-2021        |             |     |     |             |     |     |             |     |     |             |     |     |             |     |     |             |     |     |             |     |     |             |     |     |             |     |     |
| A4960                                             | Electrical Finishes                        | 2                 | 12-10-2021        |             |     |     |             |     |     |             |     |     |             |     |     |             |     |     |             |     |     |             |     |     |             |     |     |             |     |     |
| <b>Mechanical Works</b>                           |                                            | <b>66</b>         | <b>09-09-2021</b> |             |     |     |             |     |     |             |     |     |             |     |     |             |     |     |             |     |     |             |     |     |             |     |     |             |     |     |
| <b>Heating, Ventilation, and Air Conditioning</b> |                                            | <b>30</b>         | <b>09-09-2021</b> |             |     |     |             |     |     |             |     |     |             |     |     |             |     |     |             |     |     |             |     |     |             |     |     |             |     |     |
| A2970                                             | Installing Heating and Air Conditioning    | 17                | 09-09-2021        |             |     |     |             |     |     |             |     |     |             |     |     |             |     |     |             |     |     |             |     |     |             |     |     |             |     |     |
| A2980                                             | Installing Ventilation System              | 13                | 04-10-2021        |             |     |     |             |     |     |             |     |     |             |     |     |             |     |     |             |     |     |             |     |     |             |     |     |             |     |     |
| <b>Power and Service Piping Systems</b>           |                                            | <b>12</b>         | <b>21-10-2021</b> |             |     |     |             |     |     |             |     |     |             |     |     |             |     |     |             |     |     |             |     |     |             |     |     |             |     |     |
| A2990                                             | Installing Power and Service Piping System | 12                | 21-10-2021        |             |     |     |             |     |     |             |     |     |             |     |     |             |     |     |             |     |     |             |     |     |             |     |     |             |     |     |
| <b>Thermal Insulation and Freeze Protections</b>  |                                            | <b>10</b>         | <b>08-11-2021</b> |             |     |     |             |     |     |             |     |     |             |     |     |             |     |     |             |     |     |             |     |     |             |     |     |             |     |     |



| Activity ID                     | Activity Name                     | Original Duration | Start       | Qr 1, 2021                        |            |     |     |     |     |     |     |     |     |     |     | Qr 2, 2021 |     |     | Qr 3, 2021 |     |     | Qr 4, 2021 |     |     | Qr 1, 2022 |     |     | Qr 2, 2022 |     |     | Qr 3, 2022 |     |     | Qr 4, 2022 |     |     | Qr 1, 2023 |  |  |
|---------------------------------|-----------------------------------|-------------------|-------------|-----------------------------------|------------|-----|-----|-----|-----|-----|-----|-----|-----|-----|-----|------------|-----|-----|------------|-----|-----|------------|-----|-----|------------|-----|-----|------------|-----|-----|------------|-----|-----|------------|-----|-----|------------|--|--|
|                                 |                                   |                   |             | Jan                               | Feb        | Mar | Apr | May | Jun | Jul | Aug | Sep | Oct | Nov | Dec | Jan        | Feb | Mar |            |  |  |
| <b>General Works Contractor</b> |                                   |                   |             | 206                               | 01-01-2021 |     |     |     |     |     |     |     |     |     |     |            |     |     |            |     |     |            |     |     |            |     |     |            |     |     |            |     |     |            |     |     |            |  |  |
| A1120                           | Grading Site and Temporary Roads  | 8                 | 29-01-2021  | Grading Site and Temporary Roads  |            |     |     |     |     |     |     |     |     |     |     |            |     |     |            |     |     |            |     |     |            |     |     |            |     |     |            |     |     |            |     |     |            |  |  |
| A1010                           | Inspecting Construction Equipment | 8                 | 13-01-2021* | Inspecting Construction Equipment |            |     |     |     |     |     |     |     |     |     |     |            |     |     |            |     |     |            |     |     |            |     |     |            |     |     |            |     |     |            |     |     |            |  |  |
| A1000                           | Soil Tests                        | 8                 | 01-01-2021  | Soil Tests                        |            |     |     |     |     |     |     |     |     |     |     |            |     |     |            |     |     |            |     |     |            |     |     |            |     |     |            |     |     |            |     |     |            |  |  |
| A1040                           | Installing Signage and Lights     | 5                 | 10-02-2021  | Installing Signage and Lights     |            |     |     |     |     |     |     |     |     |     |     |            |     |     |            |     |     |            |     |     |            |     |     |            |     |     |            |     |     |            |     |     |            |  |  |
| A1030                           | Preparing Storage Area            | 5                 | 10-02-2021  | Preparing Storage Area            |            |     |     |     |     |     |     |     |     |     |     |            |     |     |            |     |     |            |     |     |            |     |     |            |     |     |            |     |     |            |     |     |            |  |  |
| A1020                           | Fencing                           | 4                 | 25-01-2021  | Fencing                           |            |     |     |     |     |     |     |     |     |     |     |            |     |     |            |     |     |            |     |     |            |     |     |            |     |     |            |     |     |            |     |     |            |  |  |
| A4490                           | Finishes                          | 3                 | 27-09-2021  | Finishes                          |            |     |     |     |     |     |     |     |     |     |     |            |     |     |            |     |     |            |     |     |            |     |     |            |     |     |            |     |     |            |     |     |            |  |  |
| A4440                           | Finishes                          | 3                 | 27-09-2021  | Finishes                          |            |     |     |     |     |     |     |     |     |     |     |            |     |     |            |     |     |            |     |     |            |     |     |            |     |     |            |     |     |            |     |     |            |  |  |
| A2380                           | Finishes                          | 3                 | 27-09-2021  | Finishes                          |            |     |     |     |     |     |     |     |     |     |     |            |     |     |            |     |     |            |     |     |            |     |     |            |     |     |            |     |     |            |     |     |            |  |  |
| A5140                           | Base Mat Finishes                 | 1                 | 13-09-2021  | Base Mat Finishes                 |            |     |     |     |     |     |     |     |     |     |     |            |     |     |            |     |     |            |     |     |            |     |     |            |     |     |            |     |     |            |     |     |            |  |  |
| A3960                           | Base Mat Finishes                 | 1                 | 09-08-2021  | Base Mat Finishes                 |            |     |     |     |     |     |     |     |     |     |     |            |     |     |            |     |     |            |     |     |            |     |     |            |     |     |            |     |     |            |     |     |            |  |  |
| A3840                           | Base Mat Finishes                 | 1                 | 06-07-2021  | Base Mat Finishes                 |            |     |     |     |     |     |     |     |     |     |     |            |     |     |            |     |     |            |     |     |            |     |     |            |     |     |            |     |     |            |     |     |            |  |  |
| A3250                           | Mats Finishes                     | 1                 | 15-10-2021  | Mats Finishes                     |            |     |     |     |     |     |     |     |     |     |     |            |     |     |            |     |     |            |     |     |            |     |     |            |     |     |            |     |     |            |     |     |            |  |  |
| A3220                           | Base Mat Finishes                 | 1                 | 20-07-2021  | Base Mat Finishes                 |            |     |     |     |     |     |     |     |     |     |     |            |     |     |            |     |     |            |     |     |            |     |     |            |     |     |            |     |     |            |     |     |            |  |  |
| <b>Road Works Contractor</b>    |                                   |                   |             | 8                                 | 31-01-2023 |     |     |     |     |     |     |     |     |     |     |            |     |     |            |     |     |            |     |     |            |     |     |            |     |     |            |     |     |            |     |     |            |  |  |
| A1050                           | Sub Grade                         | 4                 | 31-01-2023  | Sub Grade                         |            |     |     |     |     |     |     |     |     |     |     |            |     |     |            |     |     |            |     |     |            |     |     |            |     |     |            |     |     |            |     |     |            |  |  |
| A1070                           | Asphalt Layer 2 (70 cm)           | 2                 | 08-02-2023  | Asphalt Layer                     |            |     |     |     |     |     |     |     |     |     |     |            |     |     |            |     |     |            |     |     |            |     |     |            |     |     |            |     |     |            |     |     |            |  |  |
| A1060                           | Asphalt Layer 1 (50 cm)           | 2                 | 06-02-2023  | Asphalt Layer                     |            |     |     |     |     |     |     |     |     |     |     |            |     |     |            |     |     |            |     |     |            |     |     |            |     |     |            |     |     |            |     |     |            |  |  |
| <b>Earthworks Contractor</b>    |                                   |                   |             | 122                               | 17-02-2021 |     |     |     |     |     |     |     |     |     |     |            |     |     |            |     |     |            |     |     |            |     |     |            |     |     |            |     |     |            |     |     |            |  |  |
| A4830                           | Excavation                        | 5                 | 01-03-2021  | Excavation                        |            |     |     |     |     |     |     |     |     |     |     |            |     |     |            |     |     |            |     |     |            |     |     |            |     |     |            |     |     |            |     |     |            |  |  |
| A2810                           | Excavation                        | 5                 | 22-02-2021  | Excavation                        |            |     |     |     |     |     |     |     |     |     |     |            |     |     |            |     |     |            |     |     |            |     |     |            |     |     |            |     |     |            |     |     |            |  |  |
| A2250                           | Excavation                        | 5                 | 10-03-2021  | Excavation                        |            |     |     |     |     |     |     |     |     |     |     |            |     |     |            |     |     |            |     |     |            |     |     |            |     |     |            |     |     |            |     |     |            |  |  |
| A1660                           | Excavation                        | 5                 | 03-03-2021  | Excavation                        |            |     |     |     |     |     |     |     |     |     |     |            |     |     |            |     |     |            |     |     |            |     |     |            |     |     |            |     |     |            |     |     |            |  |  |
| A1390                           | Excavation                        | 5                 | 24-02-2021  | Excavation                        |            |     |     |     |     |     |     |     |     |     |     |            |     |     |            |     |     |            |     |     |            |     |     |            |     |     |            |     |     |            |     |     |            |  |  |
| A1080                           | Excavation                        | 5                 | 17-02-2021  | Excavation                        |            |     |     |     |     |     |     |     |     |     |     |            |     |     |            |     |     |            |     |     |            |     |     |            |     |     |            |     |     |            |     |     |            |  |  |
| A4850                           | Compaction                        | 4                 | 14-06-2021  | Compaction                        |            |     |     |     |     |     |     |     |     |     |     |            |     |     |            |     |     |            |     |     |            |     |     |            |     |     |            |     |     |            |     |     |            |  |  |
| A2830                           | Compaction                        | 4                 | 25-05-2021  | Compaction                        |            |     |     |     |     |     |     |     |     |     |     |            |     |     |            |     |     |            |     |     |            |     |     |            |     |     |            |     |     |            |     |     |            |  |  |
| A2270                           | Compaction                        | 4                 | 02-08-2021  | Compaction                        |            |     |     |     |     |     |     |     |     |     |     |            |     |     |            |     |     |            |     |     |            |     |     |            |     |     |            |     |     |            |     |     |            |  |  |
| A1680                           | Compaction                        | 4                 | 15-07-2021  | Compaction                        |            |     |     |     |     |     |     |     |     |     |     |            |     |     |            |     |     |            |     |     |            |     |     |            |     |     |            |     |     |            |     |     |            |  |  |
| A1410                           | Compaction                        | 4                 | 14-05-2021  | Compaction                        |            |     |     |     |     |     |     |     |     |     |     |            |     |     |            |     |     |            |     |     |            |     |     |            |     |     |            |     |     |            |     |     |            |  |  |
| A1100                           | Compaction                        | 4                 | 12-04-2021  | Compaction                        |            |     |     |     |     |     |     |     |     |     |     |            |     |     |            |     |     |            |     |     |            |     |     |            |     |     |            |     |     |            |     |     |            |  |  |
| A4840                           | Filling                           | 3                 | 09-06-2021  | Filling                           |            |     |     |     |     |     |     |     |     |     |     |            |     |     |            |     |     |            |     |     |            |     |     |            |     |     |            |     |     |            |     |     |            |  |  |
| A2820                           | Filling                           | 3                 | 20-05-2021  | Filling                           |            |     |     |     |     |     |     |     |     |     |     |            |     |     |            |     |     |            |     |     |            |     |     |            |     |     |            |     |     |            |     |     |            |  |  |
| A2590                           | Compaction                        | 3                 | 30-04-2021  | Compaction                        |            |     |     |     |     |     |     |     |     |     |     |            |     |     |            |     |     |            |     |     |            |     |     |            |     |     |            |     |     |            |     |     |            |  |  |
| A2580                           | Filling                           | 3                 | 27-04-2021  | Filling                           |            |     |     |     |     |     |     |     |     |     |     |            |     |     |            |     |     |            |     |     |            |     |     |            |     |     |            |     |     |            |     |     |            |  |  |
| A2570                           | Excavation                        | 3                 | 17-02-2021  | Excavation                        |            |     |     |     |     |     |     |     |     |     |     |            |     |     |            |     |     |            |     |     |            |     |     |            |     |     |            |     |     |            |     |     |            |  |  |
| A2260                           | Filling                           | 3                 | 28-07-2021  | Filling                           |            |     |     |     |     |     |     |     |     |     |     |            |     |     |            |     |     |            |     |     |            |     |     |            |     |     |            |     |     |            |     |     |            |  |  |
| A1670                           | Filling                           | 3                 | 12-07-2021  | Filling                           |            |     |     |     |     |     |     |     |     |     |     |            |     |     |            |     |     |            |     |     |            |     |     |            |     |     |            |     |     |            |     |     |            |  |  |
| A1400                           | Filling                           | 3                 | 17-05-2021  | Filling                           |            |     |     |     |     |     |     |     |     |     |     |            |     |     |            |     |     |            |     |     |            |     |     |            |     |     |            |     |     |            |     |     |            |  |  |
| A1090                           | Filling                           | 3                 | 07-04-2021  | Filling                           |            |     |     |     |     |     |     |     |     |     |     |            |     |     |            |     |     |            |     |     |            |     |     |            |     |     |            |     |     |            |     |     |            |  |  |
| <b>Formworks Contractor</b>     |                                   |                   |             | 169                               | 22-02-2021 |     |     |     |     |     |     |     |     |     |     |            |     |     |            |     |     |            |     |     |            |     |     |            |     |     |            |     |     |            |     |     |            |  |  |
| A4450                           | Shuttering                        | 15                | 06-08-2021  | Shuttering                        |            |     |     |     |     |     |     |     |     |     |     |            |     |     |            |     |     |            |     |     |            |     |     |            |     |     |            |     |     |            |     |     |            |  |  |
| A4400                           | Shuttering                        | 15                | 06-08-2021  | Shuttering                        |            |     |     |     |     |     |     |     |     |     |     |            |     |     |            |     |     |            |     |     |            |     |     |            |     |     |            |     |     |            |     |     |            |  |  |
| A2340                           | Shuttering                        | 15                | 06-08-2021  | Shuttering                        |            |     |     |     |     |     |     |     |     |     |     |            |     |     |            |     |     |            |     |     |            |     |     |            |     |     |            |     |     |            |     |     |            |  |  |
| A2650                           | Shuttering                        | 9                 | 10-03-2021  | Shuttering                        |            |     |     |     |     |     |     |     |     |     |     |            |     |     |            |     |     |            |     |     |            |     |     |            |     |     |            |     |     |            |     |     |            |  |  |
| A2600                           | Shuttering                        | 9                 | 22-02-2021  | Shuttering                        |            |     |     |     |     |     |     |     |     |     |     |            |     |     |            |     |     |            |     |     |            |     |     |            |     |     |            |     |     |            |     |     |            |  |  |
| A1740                           | Shuttering                        | 9                 | 24-05-2021  | Shuttering                        |            |     |     |     |     |     |     |     |     |     |     |            |     |     |            |     |     |            |     |     |            |     |     |            |     |     |            |     |     |            |     |     |            |  |  |
| A1690                           | Shuttering                        | 9                 | 06-05-2021  | Shuttering                        |            |     |     |     |     |     |     |     |     |     |     |            |     |     |            |     |     |            |     |     |            |     |     |            |     |     |            |     |     |            |     |     |            |  |  |
| A1470                           | Shuttering                        | 9                 | 02-04-2021  | Shuttering                        |            |     |     |     |     |     |     |     |     |     |     |            |     |     |            |     |     |            |     |     |            |     |     |            |     |     |            |     |     |            |     |     |            |  |  |
| A1420                           | Shuttering                        | 9                 | 17-03-2021  | Shuttering                        |            |     |     |     |     |     |     |     |     |     |     |            |     |     |            |     |     |            |     |     |            |     |     |            |     |     |            |     |     |            |     |     |            |  |  |
| A5100                           | Base Mat Shuttering               | 8                 | 18-08-2021  | Base Mat Shuttering               |            |     |     |     |     |     |     |     |     |     |     |            |     |     |            |     |     |            |     |     |            |     |     |            |     |     |            |     |     |            |     |     |            |  |  |
| A3920                           | Base Mat Shuttering               | 8                 | 14-07-2021  | Base Mat Shuttering               |            |     |     |     |     |     |     |     |     |     |     |            |     |     |            |     |     |            |     |     |            |     |     |            |     |     |            |     |     |            |     |     |            |  |  |
| A3800                           | Base Mat Shuttering               | 8                 | 09-06-2021  | Base Mat Shuttering               |            |     |     |     |     |     |     |     |     |     |     |            |     |     |            |     |     |            |     |     |            |     |     |            |     |     |            |     |     |            |     |     |            |  |  |
| A3180                           | Base Mat Shuttering               | 8                 | 24-06-2021  | Base Mat Shuttering               |            |     |     |     |     |     |     |     |     |     |     |            |     |     |            |     |     |            |     |     |            |     |     |            |     |     |            |     |     |            |     |     |            |  |  |
| A2530                           | Mats Shuttering                   | 8                 | 20-09-2021  | Mats Shuttering                   |            |     |     |     |     |     |     |     |     |     |     |            |     |     |            |     |     |            |     |     |            |     |     |            |     |     |            |     |     |            |     |     |            |  |  |
| A2300                           | Shuttering                        | 8                 | 25-03-2021  | Shuttering                        |            |     |     |     |     |     |     |     |     |     |     |            |     |     |            |     |     |            |     |     |            |     |     |            |     |     |            |     |     |            |     |     |            |  |  |
| A4900                           | Shuttering                        | 6                 | 14-05-2021  | Shuttering                        |            |     |     |     |     |     |     |     |     |     |     |            |     |     |            |     |     |            |     |     |            |     |     |            |     |     |            |     |     |            |     |     |            |  |  |
| A4860                           | Shuttering                        | 6                 | 04-05-2021  | Shuttering                        |            |     |     |     |     |     |     |     |     |     |     |            |     |     |            |     |     |            |     |     |            |     |     |            |     |     |            |     |     |            |     |     |            |  |  |
| A2890                           | Shuttering                        | 6                 | 26-04-2021  | Shuttering                        |            |     |     |     |     |     |     |     |     |     |     |            |     |     |            |     |     |            |     |     |            |     |     |            |     |     |            |     |     |            |     |     |            |  |  |
| A2840                           | Shuttering                        | 6                 | 13-04-2021  | Shuttering                        |            |     |     |     |     |     |     |     |     |     |     |            |     |     |            |     |     |            |     |     |            |     |     |            |     |     |            |     |     |            |     |     |            |  |  |
| A1160                           | Shuttering                        | 6                 | 09-03-2021  | Shuttering                        |            |     |     |     |     |     |     |     |     |     |     |            |     |     |            |     |     |            |     |     |            |     |     |            |     |     |            |     |     |            |     |     |            |  |  |
| A1110                           | Shuttering                        | 6                 | 24-02-2021  | Shuttering                        |            |     |     |     |     |     |     |     |     |     |     |            |     |     |            |     |     |            |     |     |            |     |     |            |     |     |            |     |     |            |     |     |            |  |  |
| A2400                           | Shuttering                        | 5                 | 17-03-2021  | Shuttering                        |            |     |     |     |     |     |     |     |     |     |     |            |     |     |            |     |     |            |     |     |            |     |     |            |     |     |            |     |     |            |     |     |            |  |  |
| A4630                           | Shuttering                        | 3                 | 08-04-2021  | Shuttering                        |            |     |     |     |     |     |     |     |     |     |     |            |     |     |            |     |     |            |     |     |            |     |     |            |     |     |            |     |     |            |     |     |            |  |  |
| A4480                           | Deshuttering                      | 3                 | 22-09-2021  | Deshuttering                      |            |     |     |     |     |     |     |     |     |     |     |            |     |     |            |     |     |            |     |     |            |     |     |            |     |     |            |     |     |            |     |     |            |  |  |
| A4430                           | Deshuttering                      | 3                 | 22-09-2021  | Deshuttering                      |            |     |     |     |     |     |     |     |     |     |     |            |     |     |            |     |     |            |     |     |            |     |     |            |     |     |            |     |     |            |     |     |            |  |  |
| A4070                           | Shuttering                        | 3                 | 22-06-2021  | Shuttering                        |            |     |     |     |     |     |     |     |     |     |     |            |     |     |            |     |     |            |     |     |            |     |     |            |     |     |            |     |     |            |     |     |            |  |  |
| A3970                           | Shuttering                        | 3                 | 03-05-2021  | Shuttering                        |            |     |     |     |     |     |     |     |     |     |     |            |     |     |            |     |     |            |     |     |            |     |     |            |     |     |            |     |     |            |     |     |            |  |  |
| A2370                           | Deshuttering                      | 3                 | 22-09-2021  | Deshuttering                      |            |     |     |     |     |     |     |     |     |     |     |            |     |     |            |     |     |            |     |     |            |     |     |            |     |     |            |     |     |            |     |     |            |  |  |
| A5130                           | Base Mat Deshuttering             | 1                 | 10-09-2021  | Base Mat Deshuttering             |            |     |     |     |     |     |     |     |     |     |     |            |     |     |            |     |     |            |     |     |            |     |     |            |     |     |            |     |     |            |     |     |            |  |  |
| A4930                           | Deshuttering                      | 1                 | 02-06-2021  | Deshuttering                      |            |     |     |     |     |     |     |     |     |     |     |            |     |     |            |     |     |            |     |     |            |     |     |            |     |     |            |     |     |            |     |     |            |  |  |
| A4880                           | Deshuttering                      | 1                 | 13-05-2021  | Deshuttering                      |            |     |     |     |     |     |     |     |     |     |     |            |     |     |            |     |     |            |     |     |            |     |     |            |     |     |            |     |     |            |     |     |            |  |  |
| A4660                           | Deshuttering                      | 1                 | 19-04-2021  | Deshuttering                      |            |     |     |     |     |     |     |     |     |     |     |            |     |     |            |     |     |            |     |     |            |     |     |            |     |     |            |     |     |            |     |     |            |  |  |
| A4100                           | Deshuttering                      | 1                 | 02-07-2021  | Deshuttering                      |            |     |     |     |     |     |     |     |     |     |     |            |     |     |            |     |     |            |     |     |            |     |     |            |     |     |            |     |     |            |     |     |            |  |  |

■ Sub Grade  
■ Asphalt Layer  
■ Asphalt Layer

■ Actual Work  
■ Critical Remaining Work  
■ Remaining Work

| Activity ID                           | Activity Name            | Original Duration | Start             | Contractors Schedule |              |     |              |              |              |             |              |                      |                      |                   |     | Power Plant Project |     |     |             |     |     |             |     |     |             |     |     |             |     |     |  |  |  |
|---------------------------------------|--------------------------|-------------------|-------------------|----------------------|--------------|-----|--------------|--------------|--------------|-------------|--------------|----------------------|----------------------|-------------------|-----|---------------------|-----|-----|-------------|-----|-----|-------------|-----|-----|-------------|-----|-----|-------------|-----|-----|--|--|--|
|                                       |                          |                   |                   | Qtr 1, 2021          |              |     | Qtr 2, 2021  |              |              | Qtr 3, 2021 |              |                      | Qtr 4, 2021          |                   |     | Qtr 1, 2022         |     |     | Qtr 2, 2022 |     |     | Qtr 3, 2022 |     |     | Qtr 4, 2022 |     |     | Qtr 1, 2023 |     |     |  |  |  |
|                                       |                          |                   |                   | Jan                  | Feb          | Mar | Apr          | May          | Jun          | Jul         | Aug          | Sep                  | Oct                  | Nov               | Dec | Jan                 | Feb | Mar | Apr         | May | Jun | Jul         | Aug | Sep | Oct         | Nov | Dec | Jan         | Feb | Mar |  |  |  |
| A4000                                 | Deshuttering             | 1                 | 13-05-2021        |                      |              |     |              |              | Deshuttering |             |              |                      |                      |                   |     |                     |     |     |             |     |     |             |     |     |             |     |     |             |     |     |  |  |  |
| A3950                                 | Base MatDeshuttering     | 1                 | 06-08-2021        |                      |              |     |              |              |              |             |              |                      | Base MatDeshuttering |                   |     |                     |     |     |             |     |     |             |     |     |             |     |     |             |     |     |  |  |  |
| A3830                                 | Base MatDeshuttering     | 1                 | 05-07-2021        |                      |              |     |              |              |              |             |              | Base MatDeshuttering |                      |                   |     |                     |     |     |             |     |     |             |     |     |             |     |     |             |     |     |  |  |  |
| A3210                                 | Base MatDeshuttering     | 1                 | 19-07-2021        |                      |              |     |              |              |              |             |              | Base MatDeshuttering |                      |                   |     |                     |     |     |             |     |     |             |     |     |             |     |     |             |     |     |  |  |  |
| A3130                                 | Mats Deshuttering        | 1                 | 14-10-2021        |                      |              |     |              |              |              |             |              |                      |                      | Mats Deshuttering |     |                     |     |     |             |     |     |             |     |     |             |     |     |             |     |     |  |  |  |
| A2920                                 | Deshuttering             | 1                 | 13-05-2021        |                      |              |     |              |              | Deshuttering |             |              |                      |                      |                   |     |                     |     |     |             |     |     |             |     |     |             |     |     |             |     |     |  |  |  |
| A2870                                 | Deshuttering             | 1                 | 23-04-2021        |                      |              |     |              | Deshuttering |              |             |              |                      |                      |                   |     |                     |     |     |             |     |     |             |     |     |             |     |     |             |     |     |  |  |  |
| A2680                                 | Deshuttering             | 1                 | 07-04-2021        |                      |              |     | Deshuttering |              |              |             |              |                      |                      |                   |     |                     |     |     |             |     |     |             |     |     |             |     |     |             |     |     |  |  |  |
| A2630                                 | Deshuttering             | 1                 | 09-03-2021        |                      | Deshuttering |     |              |              |              |             |              |                      |                      |                   |     |                     |     |     |             |     |     |             |     |     |             |     |     |             |     |     |  |  |  |
| A2430                                 | Deshuttering             | 1                 | 02-04-2021        |                      | Deshuttering |     |              |              |              |             |              |                      |                      |                   |     |                     |     |     |             |     |     |             |     |     |             |     |     |             |     |     |  |  |  |
| A2330                                 | Deshuttering             | 1                 | 22-07-2021        |                      |              |     |              |              |              |             | Deshuttering |                      |                      |                   |     |                     |     |     |             |     |     |             |     |     |             |     |     |             |     |     |  |  |  |
| A1770                                 | Deshuttering             | 1                 | 21-06-2021        |                      |              |     |              |              |              |             | Deshuttering |                      |                      |                   |     |                     |     |     |             |     |     |             |     |     |             |     |     |             |     |     |  |  |  |
| A1720                                 | Deshuttering             | 1                 | 21-05-2021        |                      |              |     |              |              |              |             | Deshuttering |                      |                      |                   |     |                     |     |     |             |     |     |             |     |     |             |     |     |             |     |     |  |  |  |
| A1500                                 | Deshuttering             | 1                 | 30-04-2021        |                      |              |     |              | Deshuttering |              |             |              |                      |                      |                   |     |                     |     |     |             |     |     |             |     |     |             |     |     |             |     |     |  |  |  |
| A1450                                 | Deshuttering             | 1                 | 01-04-2021        |                      | Deshuttering |     |              |              |              |             |              |                      |                      |                   |     |                     |     |     |             |     |     |             |     |     |             |     |     |             |     |     |  |  |  |
| A1190                                 | Deshuttering             | 1                 | 29-03-2021        |                      | Deshuttering |     |              |              |              |             |              |                      |                      |                   |     |                     |     |     |             |     |     |             |     |     |             |     |     |             |     |     |  |  |  |
| A1140                                 | Deshuttering             | 1                 | 08-03-2021        |                      | Deshuttering |     |              |              |              |             |              |                      |                      |                   |     |                     |     |     |             |     |     |             |     |     |             |     |     |             |     |     |  |  |  |
| <b>Reinforcement Works Contractor</b> |                          | <b>149</b>        | <b>17-03-2021</b> |                      |              |     |              |              |              |             |              |                      |                      |                   |     |                     |     |     |             |     |     |             |     |     |             |     |     |             |     |     |  |  |  |
| A4460                                 | RFT Placement            | 15                | 27-08-2021        |                      |              |     |              |              |              |             |              |                      |                      |                   |     |                     |     |     |             |     |     |             |     |     |             |     |     |             |     |     |  |  |  |
| A4410                                 | RFT Placement            | 15                | 27-08-2021        |                      |              |     |              |              |              |             |              |                      |                      |                   |     |                     |     |     |             |     |     |             |     |     |             |     |     |             |     |     |  |  |  |
| A2350                                 | RFT Placement            | 15                | 27-08-2021        |                      |              |     |              |              |              |             |              |                      |                      |                   |     |                     |     |     |             |     |     |             |     |     |             |     |     |             |     |     |  |  |  |
| A2310                                 | RFT Placement            | 14                | 30-06-2021        |                      |              |     |              |              |              |             |              |                      |                      |                   |     |                     |     |     |             |     |     |             |     |     |             |     |     |             |     |     |  |  |  |
| A2660                                 | RFT Placement            | 9                 | 23-03-2021        |                      |              |     |              |              |              |             |              |                      |                      |                   |     |                     |     |     |             |     |     |             |     |     |             |     |     |             |     |     |  |  |  |
| A1750                                 | RFT Placement            | 9                 | 04-06-2021        |                      |              |     |              |              |              |             |              |                      |                      |                   |     |                     |     |     |             |     |     |             |     |     |             |     |     |             |     |     |  |  |  |
| A1480                                 | RFT Placement            | 9                 | 15-04-2021        |                      |              |     |              |              |              |             |              |                      |                      |                   |     |                     |     |     |             |     |     |             |     |     |             |     |     |             |     |     |  |  |  |
| A5110                                 | Base MatRFT Placement    | 8                 | 30-08-2021        |                      |              |     |              |              |              |             |              |                      |                      |                   |     |                     |     |     |             |     |     |             |     |     |             |     |     |             |     |     |  |  |  |
| A3930                                 | Base MatRFT Placement    | 8                 | 26-07-2021        |                      |              |     |              |              |              |             |              |                      |                      |                   |     |                     |     |     |             |     |     |             |     |     |             |     |     |             |     |     |  |  |  |
| A3810                                 | Base MatRFT Placement    | 8                 | 21-06-2021        |                      |              |     |              |              |              |             |              |                      |                      |                   |     |                     |     |     |             |     |     |             |     |     |             |     |     |             |     |     |  |  |  |
| A3190                                 | Base MatRFT Placement    | 8                 | 06-07-2021        |                      |              |     |              |              |              |             |              |                      |                      |                   |     |                     |     |     |             |     |     |             |     |     |             |     |     |             |     |     |  |  |  |
| A2540                                 | Mats RFT Placement       | 8                 | 30-09-2021        |                      |              |     |              |              |              |             |              |                      |                      |                   |     |                     |     |     |             |     |     |             |     |     |             |     |     |             |     |     |  |  |  |
| A4910                                 | RFT Placement            | 6                 | 24-05-2021        |                      |              |     |              |              |              |             |              |                      |                      |                   |     |                     |     |     |             |     |     |             |     |     |             |     |     |             |     |     |  |  |  |
| A2900                                 | RFT Placement            | 6                 | 04-05-2021        |                      |              |     |              |              |              |             |              |                      |                      |                   |     |                     |     |     |             |     |     |             |     |     |             |     |     |             |     |     |  |  |  |
| A1170                                 | RFT Placement            | 6                 | 17-03-2021        |                      |              |     |              |              |              |             |              |                      |                      |                   |     |                     |     |     |             |     |     |             |     |     |             |     |     |             |     |     |  |  |  |
| A2410                                 | RFT Placement            | 5                 | 25-03-2021        |                      |              |     |              |              |              |             |              |                      |                      |                   |     |                     |     |     |             |     |     |             |     |     |             |     |     |             |     |     |  |  |  |
| A4640                                 | RFT Placement            | 3                 | 13-04-2021        |                      |              |     |              |              |              |             |              |                      |                      |                   |     |                     |     |     |             |     |     |             |     |     |             |     |     |             |     |     |  |  |  |
| A4080                                 | RFT Placement            | 3                 | 25-06-2021        |                      |              |     |              |              |              |             |              |                      |                      |                   |     |                     |     |     |             |     |     |             |     |     |             |     |     |             |     |     |  |  |  |
| A3980                                 | RFT Placement            | 3                 | 06-05-2021        |                      |              |     |              |              |              |             |              |                      |                      |                   |     |                     |     |     |             |     |     |             |     |     |             |     |     |             |     |     |  |  |  |
| <b>Concrete Works Contractor</b>      |                          | <b>160</b>        | <b>04-03-2021</b> |                      |              |     |              |              |              |             |              |                      |                      |                   |     |                     |     |     |             |     |     |             |     |     |             |     |     |             |     |     |  |  |  |
| A4470                                 | Concrete Casting         | 3                 | 17-09-2021        |                      |              |     |              |              |              |             |              |                      |                      |                   |     |                     |     |     |             |     |     |             |     |     |             |     |     |             |     |     |  |  |  |
| A4420                                 | Concrete Casting         | 3                 | 17-09-2021        |                      |              |     |              |              |              |             |              |                      |                      |                   |     |                     |     |     |             |     |     |             |     |     |             |     |     |             |     |     |  |  |  |
| A2360                                 | Concrete Casting         | 3                 | 17-09-2021        |                      |              |     |              |              |              |             |              |                      |                      |                   |     |                     |     |     |             |     |     |             |     |     |             |     |     |             |     |     |  |  |  |
| A4090                                 | Concrete Casting         | 2                 | 30-06-2021        |                      |              |     |              |              |              |             |              |                      |                      |                   |     |                     |     |     |             |     |     |             |     |     |             |     |     |             |     |     |  |  |  |
| A3990                                 | Concrete Casting         | 2                 | 11-05-2021        |                      |              |     |              |              |              |             |              |                      |                      |                   |     |                     |     |     |             |     |     |             |     |     |             |     |     |             |     |     |  |  |  |
| A3820                                 | Base MatConcrete Casting | 2                 | 01-07-2021        |                      |              |     |              |              |              |             |              |                      |                      |                   |     |                     |     |     |             |     |     |             |     |     |             |     |     |             |     |     |  |  |  |
| A2860                                 | Concrete Casting         | 2                 | 21-04-2021        |                      |              |     |              |              |              |             |              |                      |                      |                   |     |                     |     |     |             |     |     |             |     |     |             |     |     |             |     |     |  |  |  |
| A2670                                 | Concrete Casting         | 2                 | 05-04-2021        |                      |              |     |              |              |              |             |              |                      |                      |                   |     |                     |     |     |             |     |     |             |     |     |             |     |     |             |     |     |  |  |  |
| A2620                                 | Concrete Casting         | 2                 | 05-03-2021        |                      |              |     |              |              |              |             |              |                      |                      |                   |     |                     |     |     |             |     |     |             |     |     |             |     |     |             |     |     |  |  |  |
| A2550                                 | Mats Concrete Casting    | 2                 | 12-10-2021        |                      |              |     |              |              |              |             |              |                      |                      |                   |     |                     |     |     |             |     |     |             |     |     |             |     |     |             |     |     |  |  |  |
| A2320                                 | Concrete Casting         | 2                 | 20-07-2021        |                      |              |     |              |              |              |             |              |                      |                      |                   |     |                     |     |     |             |     |     |             |     |     |             |     |     |             |     |     |  |  |  |
| A1760                                 | Concrete Casting         | 2                 | 17-06-2021        |                      |              |     |              |              |              |             |              |                      |                      |                   |     |                     |     |     |             |     |     |             |     |     |             |     |     |             |     |     |  |  |  |
| A1710                                 | Concrete Casting         | 2                 | 19-05-2021        |                      |              |     |              |              |              |             |              |                      |                      |                   |     |                     |     |     |             |     |     |             |     |     |             |     |     |             |     |     |  |  |  |
| A1490                                 | Concrete Casting         | 2                 | 28-04-2021        |                      |              |     |              |              |              |             |              |                      |                      |                   |     |                     |     |     |             |     |     |             |     |     |             |     |     |             |     |     |  |  |  |
| A1440                                 | Concrete Casting         | 2                 | 30-03-2021        |                      |              |     |              |              |              |             |              |                      |                      |                   |     |                     |     |     |             |     |     |             |     |     |             |     |     |             |     |     |  |  |  |
| A1180                                 | Concrete Casting         | 2                 | 25-03-2021        |                      |              |     |              |              |              |             |              |                      |                      |                   |     |                     |     |     |             |     |     |             |     |     |             |     |     |             |     |     |  |  |  |
| A1130                                 | Concrete Casting         | 2                 | 04-03-2021        |                      |              |     |              |              |              |             |              |                      |                      |                   |     |                     |     |     |             |     |     |             |     |     |             |     |     |             |     |     |  |  |  |
| A5120                                 | Base MatConcrete Casting | 1                 | 09-09-2021        |                      |              |     |              |              |              |             |              |                      |                      |                   |     |                     |     |     |             |     |     |             |     |     |             |     |     |             |     |     |  |  |  |
| A4920                                 | Concrete Casting         | 1                 | 01-06-2021        |                      |              |     |              |              |              |             |              |                      |                      |                   |     |                     |     |     |             |     |     |             |     |     |             |     |     |             |     |     |  |  |  |
| A4870                                 | Concrete Casting         | 1                 | 12-05-2021        |                      |              |     |              |              |              |             |              |                      |                      |                   |     |                     |     |     |             |     |     |             |     |     |             |     |     |             |     |     |  |  |  |
| A4650                                 | Concrete Casting         | 1                 | 16-04-2021        |                      |              |     |              |              |              |             |              |                      |                      |                   |     |                     |     |     |             |     |     |             |     |     |             |     |     |             |     |     |  |  |  |
| A3940                                 | Base MatConcrete Casting | 1                 | 05-08-2021        |                      |              |     |              |              |              |             |              |                      |                      |                   |     |                     |     |     |             |     |     |             |     |     |             |     |     |             |     |     |  |  |  |
| A3200                                 | Base MatConcrete Casting | 1                 | 16-07-2021        |                      |              |     |              |              |              |             |              |                      |                      |                   |     |                     |     |     |             |     |     |             |     |     |             |     |     |             |     |     |  |  |  |
| A2910                                 | Concrete Casting         | 1                 | 12-05-2021        |                      |              |     |              |              |              |             |              |                      |                      |                   |     |                     |     |     |             |     |     |             |     |     |             |     |     |             |     |     |  |  |  |
| A2420                                 | Concrete Casting         | 1                 | 01-04-2021        |                      |              |     |              |              |              |             |              |                      |                      |                   |     |                     |     |     |             |     |     |             |     |     |             |     |     |             |     |     |  |  |  |
| <b>Piling Works Contractor</b>        |                          | <b>21</b>         | <b>24-02-2021</b> |                      |              |     |              |              |              |             |              |                      |                      |                   |     |                     |     |     |             |     |     |             |     |     |             |     |     |             |     |     |  |  |  |
| A2390                                 | Installing Piles         | 6                 | 24-02-2021        |                      |              |     |              |              |              |             |              |                      |                      |                   |     |                     |     |     |             |     |     |             |     |     |             |     |     |             |     |     |  |  |  |
| A2290                                 | Installing Piles         | 6                 | 17-03-2021        |                      |              |     |              |              |              |             |              |                      |                      |                   |     |                     |     |     |             |     |     |             |     |     |             |     |     |             |     |     |  |  |  |
| <b>Coating Works Contractor</b>       |                          | <b>86</b>         | <b>30-03-2021</b> |                      |              |     |              |              |              |             |              |                      |                      |                   |     |                     |     |     |             |     |     |             |     |     |             |     |     |             |     |     |  |  |  |
| A2500                                 | Coating                  | 3                 | 23-07-2021        |                      |              |     |              |              |              |             |              |                      |                      |                   |     |                     |     |     |             |     |     |             |     |     |             |     |     |             |     |     |  |  |  |
| A4940                                 | Coating                  | 2                 | 07-06-2021        |                      |              |     |              |              |              |             |              |                      |                      |                   |     |                     |     |     |             |     |     |             |     |     |             |     |     |             |     |     |  |  |  |
| A4890                                 | Coating                  | 2                 | 03-06-2021        |                      |              |     |              |              |              |             |              |                      |                      |                   |     |                     |     |     |             |     |     |             |     |     |             |     |     |             |     |     |  |  |  |
| A2930                                 | Coating                  | 2                 | 18-05-2021        |                      |              |     |              |              |              |             |              |                      |                      |                   |     |                     |     |     |             |     |     |             |     |     |             |     |     |             |     |     |  |  |  |
| A2880                                 | Coating                  | 2                 | 14-05-2021        |                      |              |     |              |              |              |             |              |                      |                      |                   |     |                     |     |     |             |     |     |             |     |     |             |     |     |             |     |     |  |  |  |
| A2690                                 | Coating                  | 2                 | 22-04-2021        |                      |              |     |              |              |              |             |              |                      |                      |                   |     |                     |     |     |             |     |     |             |     |     |             |     |     |             |     |     |  |  |  |
| A2640                                 | Coating                  | 2                 | 20-04-2021        |                      |              |     |              |              |              |             |              |                      |                      |                   |     |                     |     |     |             |     |     |             |     |     |             |     |     |             |     |     |  |  |  |
| A2440                                 | Coating                  | 2                 | 05-04-2021        |                      |              |     |              |              |              |             |              |                      |                      |                   |     |                     |     |     |             |     |     |             |     |     |             |     |     |             |     |     |  |  |  |

| Activity ID                     | Activity Name            | Original Duration | Start       | Qtr 1, 2021       |     |     | Qtr 2, 2021 |     |     | Qtr 3, 2021 |     |     | Qtr 4, 2021 |     |     | Qtr 1, 2022 |     |     | Qtr 2, 2022 |     |     | Qtr 3, 2022 |     |     | Qtr 4, 2022 |     |     | Qtr 1, 2023 |     |     |
|---------------------------------|--------------------------|-------------------|-------------|-------------------|-----|-----|-------------|-----|-----|-------------|-----|-----|-------------|-----|-----|-------------|-----|-----|-------------|-----|-----|-------------|-----|-----|-------------|-----|-----|-------------|-----|-----|
|                                 |                          |                   |             | Jan               | Feb | Mar | Apr         | May | Jun | Jul         | Aug | Sep | Oct         | Nov | Dec | Jan         | Feb | Mar | Apr         | May | Jun | Jul         | Aug | Sep | Oct         | Nov | Dec | Jan         | Feb | Mar |
| A1780                           | Coating                  | 2                 | 07-07-2021  |                   |     |     |             |     |     |             |     |     |             |     |     |             |     |     |             |     |     |             |     |     |             |     |     |             |     |     |
| A1730                           | Coating                  | 2                 | 05-07-2021  |                   |     |     |             |     |     |             |     |     |             |     |     |             |     |     |             |     |     |             |     |     |             |     |     |             |     |     |
| A1510                           | Coating                  | 2                 | 14-05-2021  |                   |     |     |             |     |     |             |     |     |             |     |     |             |     |     |             |     |     |             |     |     |             |     |     |             |     |     |
| A1460                           | Coating                  | 2                 | 14-05-2021  |                   |     |     |             |     |     |             |     |     |             |     |     |             |     |     |             |     |     |             |     |     |             |     |     |             |     |     |
| A1200                           | Coating                  | 2                 | 30-03-2021  |                   |     |     |             |     |     |             |     |     |             |     |     |             |     |     |             |     |     |             |     |     |             |     |     |             |     |     |
| A1150                           | Coating                  | 2                 | 30-03-2021  |                   |     |     |             |     |     |             |     |     |             |     |     |             |     |     |             |     |     |             |     |     |             |     |     |             |     |     |
| A4670                           | Coating                  | 1                 | 26-04-2021  |                   |     |     |             |     |     |             |     |     |             |     |     |             |     |     |             |     |     |             |     |     |             |     |     |             |     |     |
| A4110                           | Coating                  | 1                 | 09-07-2021  |                   |     |     |             |     |     |             |     |     |             |     |     |             |     |     |             |     |     |             |     |     |             |     |     |             |     |     |
| A4010                           | Coating                  | 1                 | 14-05-2021  |                   |     |     |             |     |     |             |     |     |             |     |     |             |     |     |             |     |     |             |     |     |             |     |     |             |     |     |
| <b>Lifting Works Contractor</b> |                          |                   | <b>461</b>  | <b>07-04-2021</b> |     |     |             |     |     |             |     |     |             |     |     |             |     |     |             |     |     |             |     |     |             |     |     |             |     |     |
| A4950                           | Receiving Packages       | 3                 | 15-06-2021  |                   |     |     |             |     |     |             |     |     |             |     |     |             |     |     |             |     |     |             |     |     |             |     |     |             |     |     |
| A3780                           | Receiving Packages       | 3                 | 30-04-2021  |                   |     |     |             |     |     |             |     |     |             |     |     |             |     |     |             |     |     |             |     |     |             |     |     |             |     |     |
| A2940                           | Receiving Packages       | 3                 | 26-05-2021  |                   |     |     |             |     |     |             |     |     |             |     |     |             |     |     |             |     |     |             |     |     |             |     |     |             |     |     |
| A2770                           | Receiving Package 3      | 3                 | 14-02-2022  |                   |     |     |             |     |     |             |     |     |             |     |     |             |     |     |             |     |     |             |     |     |             |     |     |             |     |     |
| A2760                           | Receiving Package 2      | 3                 | 09-02-2022  |                   |     |     |             |     |     |             |     |     |             |     |     |             |     |     |             |     |     |             |     |     |             |     |     |             |     |     |
| A2750                           | Receiving Package 1      | 3                 | 04-02-2022  |                   |     |     |             |     |     |             |     |     |             |     |     |             |     |     |             |     |     |             |     |     |             |     |     |             |     |     |
| A2210                           | Receiving Package 3      | 3                 | 01-12-2022  |                   |     |     |             |     |     |             |     |     |             |     |     |             |     |     |             |     |     |             |     |     |             |     |     |             |     |     |
| A2200                           | Receiving Package 2      | 3                 | 28-11-2022  |                   |     |     |             |     |     |             |     |     |             |     |     |             |     |     |             |     |     |             |     |     |             |     |     |             |     |     |
| A2190                           | Receiving Package 1      | 3                 | 23-11-2022  |                   |     |     |             |     |     |             |     |     |             |     |     |             |     |     |             |     |     |             |     |     |             |     |     |             |     |     |
| A1790                           | Receiving Packages       | 3                 | 16-07-2021  |                   |     |     |             |     |     |             |     |     |             |     |     |             |     |     |             |     |     |             |     |     |             |     |     |             |     |     |
| A1520                           | Receiving Packages       | 3                 | 17-05-2021  |                   |     |     |             |     |     |             |     |     |             |     |     |             |     |     |             |     |     |             |     |     |             |     |     |             |     |     |
| A5020                           | Receiving Packages       | 2                 | 10-09-2021  |                   |     |     |             |     |     |             |     |     |             |     |     |             |     |     |             |     |     |             |     |     |             |     |     |             |     |     |
| A4780                           | Receiving Transformers 3 | 2                 | 27-12-2021* |                   |     |     |             |     |     |             |     |     |             |     |     |             |     |     |             |     |     |             |     |     |             |     |     |             |     |     |
| A4760                           | Receiving Transformers 2 | 2                 | 27-12-2021* |                   |     |     |             |     |     |             |     |     |             |     |     |             |     |     |             |     |     |             |     |     |             |     |     |             |     |     |
| A4740                           | Receiving Switchers 3    | 2                 | 15-10-2021  |                   |     |     |             |     |     |             |     |     |             |     |     |             |     |     |             |     |     |             |     |     |             |     |     |             |     |     |
| A4720                           | Receiving Switchers 2    | 2                 | 13-10-2021  |                   |     |     |             |     |     |             |     |     |             |     |     |             |     |     |             |     |     |             |     |     |             |     |     |             |     |     |
| A4700                           | Receiving Generator 3    | 2                 | 16-08-2021  |                   |     |     |             |     |     |             |     |     |             |     |     |             |     |     |             |     |     |             |     |     |             |     |     |             |     |     |
| A4680                           | Receiving Generator 2    | 2                 | 12-08-2021  |                   |     |     |             |     |     |             |     |     |             |     |     |             |     |     |             |     |     |             |     |     |             |     |     |             |     |     |
| A4350                           | Receiving Package 3      | 2                 | 12-09-2022  |                   |     |     |             |     |     |             |     |     |             |     |     |             |     |     |             |     |     |             |     |     |             |     |     |             |     |     |
| A4320                           | Receiving Package 2      | 2                 | 29-08-2022  |                   |     |     |             |     |     |             |     |     |             |     |     |             |     |     |             |     |     |             |     |     |             |     |     |             |     |     |
| A4280                           | Receiving Feeder 3       | 2                 | 04-11-2021  |                   |     |     |             |     |     |             |     |     |             |     |     |             |     |     |             |     |     |             |     |     |             |     |     |             |     |     |
| A4260                           | Receiving Feeder 2       | 2                 | 02-11-2021  |                   |     |     |             |     |     |             |     |     |             |     |     |             |     |     |             |     |     |             |     |     |             |     |     |             |     |     |
| A4210                           | Receiving Condenser 3    | 2                 | 29-12-2021* |                   |     |     |             |     |     |             |     |     |             |     |     |             |     |     |             |     |     |             |     |     |             |     |     |             |     |     |
| A4180                           | Receiving Condenser 2    | 2                 | 24-12-2021* |                   |     |     |             |     |     |             |     |     |             |     |     |             |     |     |             |     |     |             |     |     |             |     |     |             |     |     |
| A4140                           | Receiving Turbine 3      | 2                 | 26-11-2021  |                   |     |     |             |     |     |             |     |     |             |     |     |             |     |     |             |     |     |             |     |     |             |     |     |             |     |     |
| A4120                           | Receiving Turbine 2      | 2                 | 24-11-2021  |                   |     |     |             |     |     |             |     |     |             |     |     |             |     |     |             |     |     |             |     |     |             |     |     |             |     |     |
| A4040                           | Receiving Boiler 3       | 2                 | 26-08-2021  |                   |     |     |             |     |     |             |     |     |             |     |     |             |     |     |             |     |     |             |     |     |             |     |     |             |     |     |
| A4020                           | Receiving Boiler 2       | 2                 | 24-08-2021  |                   |     |     |             |     |     |             |     |     |             |     |     |             |     |     |             |     |     |             |     |     |             |     |     |             |     |     |
| A3030                           | Receiving Packages       | 2                 | 06-08-2021  |                   |     |     |             |     |     |             |     |     |             |     |     |             |     |     |             |     |     |             |     |     |             |     |     |             |     |     |
| A2740                           | Receiving Transformers 1 | 2                 | 27-12-2021* |                   |     |     |             |     |     |             |     |     |             |     |     |             |     |     |             |     |     |             |     |     |             |     |     |             |     |     |
| A2730                           | Receiving Switchers 1    | 2                 | 11-10-2021  |                   |     |     |             |     |     |             |     |     |             |     |     |             |     |     |             |     |     |             |     |     |             |     |     |             |     |     |
| A2720                           | Receiving Generator 1    | 2                 | 10-08-2021  |                   |     |     |             |     |     |             |     |     |             |     |     |             |     |     |             |     |     |             |     |     |             |     |     |             |     |     |
| A2090                           | Receiving Package 1      | 2                 | 25-08-2022  |                   |     |     |             |     |     |             |     |     |             |     |     |             |     |     |             |     |     |             |     |     |             |     |     |             |     |     |
| A1990                           | Receiving Feeder 1       | 2                 | 28-09-2021  |                   |     |     |             |     |     |             |     |     |             |     |     |             |     |     |             |     |     |             |     |     |             |     |     |             |     |     |
| A1900                           | Receiving Condenser 1    | 2                 | 22-12-2021* |                   |     |     |             |     |     |             |     |     |             |     |     |             |     |     |             |     |     |             |     |     |             |     |     |             |     |     |
| A1800                           | Receiving Turbine 1      | 2                 | 22-11-2021  |                   |     |     |             |     |     |             |     |     |             |     |     |             |     |     |             |     |     |             |     |     |             |     |     |             |     |     |
| A1530                           | Receiving Boiler 1       | 2                 | 20-08-2021  |                   |     |     |             |     |     |             |     |     |             |     |     |             |     |     |             |     |     |             |     |     |             |     |     |             |     |     |
| A4570                           | Receiving Package 3      | 1                 | 09-12-2022  |                   |     |     |             |     |     |             |     |     |             |     |     |             |     |     |             |     |     |             |     |     |             |     |     |             |     |     |
| A4540                           | Receiving Package 2      | 1                 | 01-12-2022  |                   |     |     |             |     |     |             |     |     |             |     |     |             |     |     |             |     |     |             |     |     |             |     |     |             |     |     |
| A1290                           | Receiving Package 3      | 1                 | 09-04-2021  |                   |     |     |             |     |     |             |     |     |             |     |     |             |     |     |             |     |     |             |     |     |             |     |     |             |     |     |
| A3460                           | Receiving Package 3      | 1                 | 11-01-2023  |                   |     |     |             |     |     |             |     |     |             |     |     |             |     |     |             |     |     |             |     |     |             |     |     |             |     |     |
| A3390                           | Receiving Package 3      | 1                 | 26-10-2022  |                   |     |     |             |     |     |             |     |     |             |     |     |             |     |     |             |     |     |             |     |     |             |     |     |             |     |     |
| A3370                           | Receiving of Package 3   | 1                 | 21-09-2022  |                   |     |     |             |     |     |             |     |     |             |     |     |             |     |     |             |     |     |             |     |     |             |     |     |             |     |     |
| A1280                           | Receiving Package 2      | 1                 | 08-04-2021  |                   |     |     |             |     |     |             |     |     |             |     |     |             |     |     |             |     |     |             |     |     |             |     |     |             |     |     |
| A2470                           | Receiving Package 3      | 1                 | 09-04-2021  |                   |     |     |             |     |     |             |     |     |             |     |     |             |     |     |             |     |     |             |     |     |             |     |     |             |     |     |
| A2460                           | Receiving Package 2      | 1                 | 08-04-2021  |                   |     |     |             |     |     |             |     |     |             |     |     |             |     |     |             |     |     |             |     |     |             |     |     |             |     |     |
| A2450                           | Receiving Package 1      | 1                 | 07-04-2021  |                   |     |     |             |     |     |             |     |     |             |     |     |             |     |     |             |     |     |             |     |     |             |     |     |             |     |     |
| A2240                           | Receiving Package 2      | 1                 | 10-01-2023  |                   |     |     |             |     |     |             |     |     |             |     |     |             |     |     |             |     |     |             |     |     |             |     |     |             |     |     |
| A2230                           | Receiving Package 1      | 1                 | 09-01-2023  |                   |     |     |             |     |     |             |     |     |             |     |     |             |     |     |             |     |     |             |     |     |             |     |     |             |     |     |
| A2180                           | Receiving Package 1      | 1                 | 23-11-2022  |                   |     |     |             |     |     |             |     |     |             |     |     |             |     |     |             |     |     |             |     |     |             |     |     |             |     |     |
| A2170                           | Receiving Package 2      | 1                 | 25-10-2022  |                   |     |     |             |     |     |             |     |     |             |     |     |             |     |     |             |     |     |             |     |     |             |     |     |             |     |     |
| A2160                           | Receiving Package 1      | 1                 | 24-10-2022  |                   |     |     |             |     |     |             |     |     |             |     |     |             |     |     |             |     |     |             |     |     |             |     |     |             |     |     |
| A2150                           | Receiving Package 3      | 1                 | 26-09-2022  |                   |     |     |             |     |     |             |     |     |             |     |     |             |     |     |             |     |     |             |     |     |             |     |     |             |     |     |
| A2140                           | Receiving Package 2      | 1                 | 23-09-2022  |                   |     |     |             |     |     |             |     |     |             |     |     |             |     |     |             |     |     |             |     |     |             |     |     |             |     |     |
| A2130                           | Receiving Package 1      | 1                 | 22-09-2022  |                   |     |     |             |     |     |             |     |     |             |     |     |             |     |     |             |     |     |             |     |     |             |     |     |             |     |     |
| A2120                           | Receiving of Package 2   | 1                 | 06-09-2022  |                   |     |     |             |     |     |             |     |     |             |     |     |             |     |     |             |     |     |             |     |     |             |     |     |             |     |     |
| A2110                           | Receiving of Package 1   | 1                 | 05-09-2022  |                   |     |     |             |     |     |             |     |     |             |     |     |             |     |     |             |     |     |             |     |     |             |     |     |             |     |     |
| A2020                           | Receiving Package 3      | 1                 | 15-12-2021* |                   |     |     |             |     |     |             |     |     |             |     |     |             |     |     |             |     |     |             |     |     |             |     |     |             |     |     |
| A2010                           | Receiving Package 2      | 1                 | 18-11-2021  |                   |     |     |             |     |     |             |     |     |             |     |     |             |     |     |             |     |     |             |     |     |             |     |     |             |     |     |
| A2000                           | Receiving Package 1      | 1                 | 14-10-2021  |                   |     |     |             |     |     |             |     |     |             |     |     |             |     |     |             |     |     |             |     |     |             |     |     |             |     |     |
| A1940                           | Receiving Package 3      | 1                 | 23-03-2022  |                   |     |     |             |     |     |             |     |     |             |     |     |             |     |     |             |     |     |             |     |     |             |     |     |             |     |     |
| A1930                           | Receiving Package 2      | 1                 | 22-02-2022  |                   |     |     |             |     |     |             |     |     |             |     |     |             |     |     |             |     |     |             |     |     |             |     |     |             |     |     |
| A1920                           | Receiving Package 1      | 1                 | 24-01-2022  |                   |     |     |             |     |     |             |     |     |             |     |     |             |     |     |             |     |     |             |     |     |             |     |     |             |     |     |
| A1860                           | Receiving Package 3      | 1                 | 17-12-2021* |                   |     |     |             |     |     |             |     |     |             |     |     |             |     |     |             |     |     |             |     |     |             |     |     |             |     |     |
| A1850                           | Receiving Package 2      | 1                 | 09-12-2021* |                   |     |     |             |     |     |             |     |     |             |     |     |             |     |     |             |     |     |             |     |     |             |     |     |             |     |     |
| A1840                           | Receiving Package 1      | 1                 | 07-12-2021* |                   |     |     |             |     |     |             |     |     |             |     |     |             |     |     |             |     |     |             |     |     |             |     |     |             |     |     |

Actual Work      Critical Remaining Work  
 Remaining Work

| Activity ID                        | Activity Name                                  | Original Duration | Start       | Qr 1, 2021 |     |     | Qr 2, 2021 |     |     | Qr 3, 2021 |     |     | Qr 4, 2021 |     |     | Qr 1, 2022 |     |     | Qr 2, 2022 |     |     | Qr 3, 2022 |     |     | Qr 4, 2022 |     |     | Qr 1, 2023 |     |     |
|------------------------------------|------------------------------------------------|-------------------|-------------|------------|-----|-----|------------|-----|-----|------------|-----|-----|------------|-----|-----|------------|-----|-----|------------|-----|-----|------------|-----|-----|------------|-----|-----|------------|-----|-----|
|                                    |                                                |                   |             | Jan        | Feb | Mar | Apr        | May | Jun | Jul        | Aug | Sep | Oct        | Nov | Dec | Jan        | Feb | Mar | Apr        | May | Jun | Jul        | Aug | Sep | Oct        | Nov | Dec | Jan        | Feb | Mar |
| A1560                              | Receiving Package 3                            | 1                 | 01-03-2022  |            |     |     |            |     |     |            |     |     |            |     |     |            |     |     |            |     |     |            |     |     |            |     |     |            |     |     |
| A1550                              | Receiving Package 2                            | 1                 | 28-01-2022  |            |     |     |            |     |     |            |     |     |            |     |     |            |     |     |            |     |     |            |     |     |            |     |     |            |     |     |
| A1540                              | Receiving Package 1                            | 1                 | 30-12-2021* |            |     |     |            |     |     |            |     |     |            |     |     |            |     |     |            |     |     |            |     |     |            |     |     |            |     |     |
| A1360                              | Receiving Package 3                            | 1                 | 14-04-2021  |            |     |     |            |     |     |            |     |     |            |     |     |            |     |     |            |     |     |            |     |     |            |     |     |            |     |     |
| A1350                              | Receiving Package 2                            | 1                 | 13-04-2021  |            |     |     |            |     |     |            |     |     |            |     |     |            |     |     |            |     |     |            |     |     |            |     |     |            |     |     |
| A1340                              | Receiving Package 1                            | 1                 | 12-04-2021  |            |     |     |            |     |     |            |     |     |            |     |     |            |     |     |            |     |     |            |     |     |            |     |     |            |     |     |
| A1270                              | Receiving Package 1                            | 1                 | 07-04-2021  |            |     |     |            |     |     |            |     |     |            |     |     |            |     |     |            |     |     |            |     |     |            |     |     |            |     |     |
| <b>Mechanical Works Contractor</b> |                                                | 466               | 16-04-2021  |            |     |     |            |     |     |            |     |     |            |     |     |            |     |     |            |     |     |            |     |     |            |     |     |            |     |     |
| A4050                              | Installing Main Boiler 3                       | 25                | 02-11-2021  |            |     |     |            |     |     |            |     |     |            |     |     |            |     |     |            |     |     |            |     |     |            |     |     |            |     |     |
| A4030                              | Installing Main Boiler 2                       | 25                | 28-09-2021  |            |     |     |            |     |     |            |     |     |            |     |     |            |     |     |            |     |     |            |     |     |            |     |     |            |     |     |
| A1820                              | Installing Main Boiler 1                       | 25                | 24-08-2021  |            |     |     |            |     |     |            |     |     |            |     |     |            |     |     |            |     |     |            |     |     |            |     |     |            |     |     |
| A4150                              | Installing Main Turbine 3                      | 22                | 28-01-2022  |            |     |     |            |     |     |            |     |     |            |     |     |            |     |     |            |     |     |            |     |     |            |     |     |            |     |     |
| A4130                              | Installing Main Turbine 2                      | 22                | 29-12-2021* |            |     |     |            |     |     |            |     |     |            |     |     |            |     |     |            |     |     |            |     |     |            |     |     |            |     |     |
| A3280                              | Installing Main Turbine 1                      | 22                | 24-11-2021  |            |     |     |            |     |     |            |     |     |            |     |     |            |     |     |            |     |     |            |     |     |            |     |     |            |     |     |
| A4220                              | Installing Main Condenser 3                    | 18                | 22-02-2022  |            |     |     |            |     |     |            |     |     |            |     |     |            |     |     |            |     |     |            |     |     |            |     |     |            |     |     |
| A4190                              | Installing Main Condenser 2                    | 18                | 24-01-2022  |            |     |     |            |     |     |            |     |     |            |     |     |            |     |     |            |     |     |            |     |     |            |     |     |            |     |     |
| A2050                              | Installing Thermocouple and Test Well          | 18                | 07-01-2022  |            |     |     |            |     |     |            |     |     |            |     |     |            |     |     |            |     |     |            |     |     |            |     |     |            |     |     |
| A2030                              | Installing Shell and Tube Relief Valve         | 18                | 17-12-2021* |            |     |     |            |     |     |            |     |     |            |     |     |            |     |     |            |     |     |            |     |     |            |     |     |            |     |     |
| A1910                              | Installing Main Condenser 1                    | 18                | 24-12-2021* |            |     |     |            |     |     |            |     |     |            |     |     |            |     |     |            |     |     |            |     |     |            |     |     |            |     |     |
| A4970                              | Installing Heating and Air Conditioning        | 17                | 14-10-2021  |            |     |     |            |     |     |            |     |     |            |     |     |            |     |     |            |     |     |            |     |     |            |     |     |            |     |     |
| A3620                              | Installing Control System                      | 17                | 28-03-2022  |            |     |     |            |     |     |            |     |     |            |     |     |            |     |     |            |     |     |            |     |     |            |     |     |            |     |     |
| A2970                              | Installing Heating and Air Conditioning        | 17                | 09-09-2021  |            |     |     |            |     |     |            |     |     |            |     |     |            |     |     |            |     |     |            |     |     |            |     |     |            |     |     |
| A3600                              | Installing Dust Control System                 | 15                | 02-06-2021  |            |     |     |            |     |     |            |     |     |            |     |     |            |     |     |            |     |     |            |     |     |            |     |     |            |     |     |
| A2040                              | Installing Thermometer                         | 15                | 17-12-2021* |            |     |     |            |     |     |            |     |     |            |     |     |            |     |     |            |     |     |            |     |     |            |     |     |            |     |     |
| A1960                              | Installing Circulating Water Pumps             | 15                | 11-04-2022  |            |     |     |            |     |     |            |     |     |            |     |     |            |     |     |            |     |     |            |     |     |            |     |     |            |     |     |
| A1880                              | Installing Valve Arrangements                  | 15                | 11-03-2022  |            |     |     |            |     |     |            |     |     |            |     |     |            |     |     |            |     |     |            |     |     |            |     |     |            |     |     |
| A1570                              | Installing Coal Burners                        | 15                | 02-03-2022  |            |     |     |            |     |     |            |     |     |            |     |     |            |     |     |            |     |     |            |     |     |            |     |     |            |     |     |
| A5010                              | Installing Fire Protection System              | 14                | 10-12-2021* |            |     |     |            |     |     |            |     |     |            |     |     |            |     |     |            |     |     |            |     |     |            |     |     |            |     |     |
| A3020                              | Installing Fire Protection System              | 14                | 22-11-2021  |            |     |     |            |     |     |            |     |     |            |     |     |            |     |     |            |     |     |            |     |     |            |     |     |            |     |     |
| A4980                              | Installing Ventilation System                  | 13                | 08-11-2021  |            |     |     |            |     |     |            |     |     |            |     |     |            |     |     |            |     |     |            |     |     |            |     |     |            |     |     |
| A2980                              | Installing Ventilation System                  | 13                | 04-10-2021  |            |     |     |            |     |     |            |     |     |            |     |     |            |     |     |            |     |     |            |     |     |            |     |     |            |     |     |
| A4990                              | Installing Power and Service Piping System     | 12                | 25-11-2021  |            |     |     |            |     |     |            |     |     |            |     |     |            |     |     |            |     |     |            |     |     |            |     |     |            |     |     |
| A3420                              | Installing Pipes                               | 12                | 22-09-2022  |            |     |     |            |     |     |            |     |     |            |     |     |            |     |     |            |     |     |            |     |     |            |     |     |            |     |     |
| A2990                              | Installing Power and Service Piping System     | 12                | 21-10-2021  |            |     |     |            |     |     |            |     |     |            |     |     |            |     |     |            |     |     |            |     |     |            |     |     |            |     |     |
| A1950                              | Installing Tubes                               | 12                | 24-03-2022  |            |     |     |            |     |     |            |     |     |            |     |     |            |     |     |            |     |     |            |     |     |            |     |     |            |     |     |
| A1640                              | Installing Air Recovery Equip and Preheaters   | 12                | 21-06-2022  |            |     |     |            |     |     |            |     |     |            |     |     |            |     |     |            |     |     |            |     |     |            |     |     |            |     |     |
| A1630                              | Installing Draft Fans, Ducts, and Flues        | 12                | 03-06-2022  |            |     |     |            |     |     |            |     |     |            |     |     |            |     |     |            |     |     |            |     |     |            |     |     |            |     |     |
| A1600                              | Installing Pulverizers                         | 12                | 22-04-2022  |            |     |     |            |     |     |            |     |     |            |     |     |            |     |     |            |     |     |            |     |     |            |     |     |            |     |     |
| A1590                              | Installing Coal Bumer Mgmt System              | 12                | 06-04-2022  |            |     |     |            |     |     |            |     |     |            |     |     |            |     |     |            |     |     |            |     |     |            |     |     |            |     |     |
| A3300                              | Installing Extraction System                   | 11                | 27-04-2022  |            |     |     |            |     |     |            |     |     |            |     |     |            |     |     |            |     |     |            |     |     |            |     |     |            |     |     |
| A5000                              | Installing Thermal and Freeze Insulations      | 10                | 22-11-2021  |            |     |     |            |     |     |            |     |     |            |     |     |            |     |     |            |     |     |            |     |     |            |     |     |            |     |     |
| A4360                              | Installing Circulating Water Pumps 3           | 10                | 14-09-2022  |            |     |     |            |     |     |            |     |     |            |     |     |            |     |     |            |     |     |            |     |     |            |     |     |            |     |     |
| A4330                              | Installing Circulating Water Pumps 2           | 10                | 05-09-2022  |            |     |     |            |     |     |            |     |     |            |     |     |            |     |     |            |     |     |            |     |     |            |     |     |            |     |     |
| A4290                              | Installing Closed Type Feedwater Heater 3      | 10                | 18-11-2021  |            |     |     |            |     |     |            |     |     |            |     |     |            |     |     |            |     |     |            |     |     |            |     |     |            |     |     |
| A4270                              | Installing Closed Type Feedwater Heater 2      | 10                | 04-11-2021  |            |     |     |            |     |     |            |     |     |            |     |     |            |     |     |            |     |     |            |     |     |            |     |     |            |     |     |
| A3630                              | Installing Switches and Instrumentations       | 10                | 10-10-2022  |            |     |     |            |     |     |            |     |     |            |     |     |            |     |     |            |     |     |            |     |     |            |     |     |            |     |     |
| A3400                              | Installing Pipes                               | 10                | 27-10-2022  |            |     |     |            |     |     |            |     |     |            |     |     |            |     |     |            |     |     |            |     |     |            |     |     |            |     |     |
| A3340                              | Installing Closed Type Feedwater Heater 1      | 10                | 30-09-2021  |            |     |     |            |     |     |            |     |     |            |     |     |            |     |     |            |     |     |            |     |     |            |     |     |            |     |     |
| A3290                              | Installing Lubrication System                  | 10                | 13-04-2022  |            |     |     |            |     |     |            |     |     |            |     |     |            |     |     |            |     |     |            |     |     |            |     |     |            |     |     |
| A3000                              | Installing Thermal and Freeze Insulations      | 10                | 08-11-2021  |            |     |     |            |     |     |            |     |     |            |     |     |            |     |     |            |     |     |            |     |     |            |     |     |            |     |     |
| A2100                              | Installing Circulating Water Pumps 1           | 10                | 29-08-2022  |            |     |     |            |     |     |            |     |     |            |     |     |            |     |     |            |     |     |            |     |     |            |     |     |            |     |     |
| A1580                              | Installing Coal Bumer Air Guide Registers      | 10                | 23-03-2022  |            |     |     |            |     |     |            |     |     |            |     |     |            |     |     |            |     |     |            |     |     |            |     |     |            |     |     |
| A3480                              | Installing Control Instruments                 | 9                 | 09-08-2022  |            |     |     |            |     |     |            |     |     |            |     |     |            |     |     |            |     |     |            |     |     |            |     |     |            |     |     |
| A3330                              | Installing Atmospheric Relief Valves           | 9                 | 03-06-2022  |            |     |     |            |     |     |            |     |     |            |     |     |            |     |     |            |     |     |            |     |     |            |     |     |            |     |     |
| A3270                              | Installing Piping and Valves                   | 9                 | 27-07-2022  |            |     |     |            |     |     |            |     |     |            |     |     |            |     |     |            |     |     |            |     |     |            |     |     |            |     |     |
| A2560                              | Installing Flue Gas Cleanup System             | 9                 | 14-07-2022  |            |     |     |            |     |     |            |     |     |            |     |     |            |     |     |            |     |     |            |     |     |            |     |     |            |     |     |
| A1810                              | Installing Built Conveyors                     | 9                 | 12-05-2021  |            |     |     |            |     |     |            |     |     |            |     |     |            |     |     |            |     |     |            |     |     |            |     |     |            |     |     |
| A1970                              | Installing Howell Pumps                        | 9                 | 02-05-2022  |            |     |     |            |     |     |            |     |     |            |     |     |            |     |     |            |     |     |            |     |     |            |     |     |            |     |     |
| A1620                              | Installing Ash Hopper                          | 9                 | 23-05-2022  |            |     |     |            |     |     |            |     |     |            |     |     |            |     |     |            |     |     |            |     |     |            |     |     |            |     |     |
| A1610                              | Installing Stokers and Gates                   | 9                 | 10-05-2022  |            |     |     |            |     |     |            |     |     |            |     |     |            |     |     |            |     |     |            |     |     |            |     |     |            |     |     |
| A1380                              | Installing Feeders                             | 9                 | 29-04-2021  |            |     |     |            |     |     |            |     |     |            |     |     |            |     |     |            |     |     |            |     |     |            |     |     |            |     |     |
| A1370                              | Installing Track-Truck Hoppers                 | 9                 | 16-04-2021  |            |     |     |            |     |     |            |     |     |            |     |     |            |     |     |            |     |     |            |     |     |            |     |     |            |     |     |
| A4160                              | Installing Operating Instruments               | 8                 | 12-05-2022  |            |     |     |            |     |     |            |     |     |            |     |     |            |     |     |            |     |     |            |     |     |            |     |     |            |     |     |
| A3610                              | Installing Inlet and Discharge Water Pipes     | 8                 | 16-06-2022  |            |     |     |            |     |     |            |     |     |            |     |     |            |     |     |            |     |     |            |     |     |            |     |     |            |     |     |
| A3380                              | Installing Cooling Water Pumps                 | 8                 | 27-09-2022  |            |     |     |            |     |     |            |     |     |            |     |     |            |     |     |            |     |     |            |     |     |            |     |     |            |     |     |
| A3360                              | Installing Boiler Feed Suction Discharge Pipes | 8                 | 16-03-2022  |            |     |     |            |     |     |            |     |     |            |     |     |            |     |     |            |     |     |            |     |     |            |     |     |            |     |     |
| A3350                              | Installing Boiler Feedwater Pumps              | 8                 | 04-03-2022  |            |     |     |            |     |     |            |     |     |            |     |     |            |     |     |            |     |     |            |     |     |            |     |     |            |     |     |
| A2070                              | Installing Drain Outlet                        | 8                 | 14-02-2022  |            |     |     |            |     |     |            |     |     |            |     |     |            |     |     |            |     |     |            |     |     |            |     |     |            |     |     |
| A2060                              | Installing Steam Inlet                         | 8                 | 02-02-2022  |            |     |     |            |     |     |            |     |     |            |     |     |            |     |     |            |     |     |            |     |     |            |     |     |            |     |     |
| A1980                              | Installing Air Removal Equipment               | 8                 | 13-05-2022  |            |     |     |            |     |     |            |     |     |            |     |     |            |     |     |            |     |     |            |     |     |            |     |     |            |     |     |
| A1890                              | Installing Gear Arrangements and Controls      | 8                 | 01-04-2022  |            |     |     |            |     |     |            |     |     |            |     |     |            |     |     |            |     |     |            |     |     |            |     |     |            |     |     |
| A1870                              | Installing Overspeed Governors                 | 8                 | 01-03-2022  |            |     |     |            |     |     |            |     |     |            |     |     |            |     |     |            |     |     |            |     |     |            |     |     |            |     |     |
| A3640                              | Installing Switches and Instrumentations       | 7                 | 10-11-2022  |            |     |     |            |     |     |            |     |     |            |     |     |            |     |     |            |     |     |            |     |     |            |     |     |            |     |     |
| A3320                              | Installing Priming Ejectors                    | 7                 | 25-05-2022  |            |     |     |            |     |     |            |     |     |            |     |     |            |     |     |            |     |     |            |     |     |            |     |     |            |     |     |
| A4600                              | Installing Air Dryers                          | 6                 | 30-12-2022  |            |     |     |            |     |     |            |     |     |            |     |     |            |     |     |            |     |     |            |     |     |            |     |     |            |     |     |
| A4560                              | Installing Air Receivers                       | 6                 | 22-12-2022  |            |     |     |            |     |     |            |     |     |            |     |     |            |     |     |            |     |     |            |     |     |            |     |     |            |     |     |
